# Supplementary material for: Acid–base physiology over tidal periods in the mussel Mytilus edulis: size and temperature are more influential than seawater pH
Source: Proc Biol Sci. 2019 Feb 20;286(1897):20182863. doi: 10.1098/rspb.2018.2863 (PMC6408882; doi:10.1098/rspb.2018.2863)
Supplement: Supplementary meta-data [file rspb20182863supp2.xlsx]

## Sheet: Metadata
METADATA	Starcross and Port Gaverne Field and laboratory data
Data collected by	Stephanie Mangan	University of Exeter & Plymouth Marine Laboratory
Co-authors	Ceri Lewis	University of Exeter
	Helen Findlay	Plymouth Marine Laboratory
	Rod Wilson	University of Exeter
Sheet name	Description
Metadata	Metadata details, headings, units, etc.
FieldData	Data from fieldwork: mussel haemolymph data and seawater carbonate chemistry
LabDataBiol	Data from the laboratory work: mussel haemolymph data
LabDataChem	Data from the laboratory work: seawater carbonate chemistry data
Column heading	Full name	Units	Instrument
Location	Sample location
Date.time	Date and time [dd/mm/yyyy hh:mm]
TideHeight	Tide height	m
H.Temp	Haemolymph temperature	degree Celsius	Temperture probe
H.pH	Haemolymph pH	NBS scale	Metrohm (826 pH mobile) pH NBS electrode
H.TCO2	Haemolymph Total carbon dioxide	milli-Molar	Corning 965 CO2 analyser (Corning Ltd., UK)
H.[HCO3]	Haemeolymph bicarbonate ion concentration	milli-Molar	See notes
H.pCO2	Haemeolymph partial pressure of carbon dioxdide	Kilopascal	See notes
SW.pH	Seawater pH	NBS scale	Metrohm (826 pH mobile) pH NBS electrode
SW.DIC	Seawater dissolved inorganic carbon	micro-mole per kilogram	Custom-built DIC machine, see Lewis et al. 2013
SW.TA	Seawater total alkalinity	micro-mole per kilogram	Calculated from pH and TCO2 using CO2sys
SW.pCO2	Seawater partial pressure of carbon dioxide	micro-atmosphere	Calculated from pH and TCO2 using CO2sys
SW.HCO3	Seawater bicarbonate ion concentration	micro-mole per kilogram	Calculated from pH and TCO2 using CO2sys
SW.CO3	Seawater carbonate ion concentraion	micro-mole per kilogram	Calculated from pH and TCO2 using CO2sys
SW.Temp	Seawater temperature	degree Celsius	Mettler Toledo SG7 SevenGo pro conductivity meter
SW.Sal	Seawater salinity	psu	Mettler Toledo SG7 SevenGo pro conductivity meter
Air.Temp	Air temperature	degree Celsius	HOBO Pendant® Temperature/Light Data Loggers
QC	Quality control	1 = good; 2 = questionable; 3 = derived
ShellLength	Shell Length	mm
Experiment	Experiment description (emersion or recovery)
Treatment.Time	Time through the exposure (either emersion or recovery) [hh:mm]
Size	Mussel size (large or small)
Treatment.Temp	Treatment temperature (during emersion)	degree Celsius	Mettler Toledo SG7 SevenGo pro conductivity meter
Treatment.pH	Treatment pH (during immersion)	NBS scale	Metrohm (826 pH mobile) pH NBS electrode
Notes
Haemolymph parameters calculated from pH and TCO2 using modified Henderson-Hasselbalch equation with the first dissociation constant (pK) for carbonic acid and solubility constant (αCO2) for carbon dioxide derived from Truchot 1976.
pK and αCO2 constants are caclulated using 2nd and 4th order polynomial algorithms, respectively. These calculated constants are only appropriate for haemolymph of Carcinus meanas at a salinity of 35.
Questionable data were excluded from analysis for the paper, as were any derived values which relied on questionable data
References
Lewis C, Clemow K, & Holt WV (2013) Metal contamination increases the sensitivity of larvae but not gametes to ocean acidification in the polychaete Pomatoceros lamarckii (Quatrefages). Marine Biology 160(8):2089-2101.
Truchot JP (1976) Carbon dioxide combining properties of blood of shore crab Carcinus maenas-l - carbon dioxide solubility coefficient and carbonic acid dissociation constants. Journal of Experimental Biology 64(1):45-57.

## Sheet: FieldData
Location	Date.time	TideHeight	H.Temp	QC	H.pH	QC	H.TCO2	QC	H.[HCO3]	QC	H.pCO2	QC	SW.pH	QC	SW.Temp	QC	SW.Sal	QC	Air.Temp	QC	SW.DIC	QC	SW.TA	QC	SW.pCO2	QC	SW.HCO3	QC	SW.CO3	QC
Starcross	2014-11-20 07:30:00	2.81429	11.6	1	7.57	1	2.6	1	2.52465	3	0.182141	3	8.19	1	11.6	1	26.8	1	11.4	1	2092.5	1	2305.8	3	287.7	3	1919.1	3	160.9	3
Starcross	2014-11-20 07:30:00	2.81429	11.6	1	7.6	1	1.9	1	1.84852	3	0.124459	3
Starcross	2014-11-20 07:30:00	2.81429	11.6	1	7.62	1	1.8	1	1.75336	3	0.11274	3
Starcross	2014-11-20 08:00:00	2.5	11.4	1	7.48	1	2	1	1.92899	3	0.170608	3	8.16	1	11.4	1	25.4	1	11.3	1	2084.5	1	2271.4	3	312.4	3	1926.9	3	143.8	3
Starcross	2014-11-20 08:00:00	2.5	11.4	1	7.57	1	1.8	1	1.74771	3	0.125643	3
Starcross	2014-11-20 08:00:00	2.5	11.4	1	7.71	1	2.1	1	2.05545	3	0.107047	3
Starcross	2014-11-20 08:30:00	2.17143	11.6	1	7.43	1	1.9	1	1.82482	3	0.18173	3	8	1	11.6	1	23.3	1	11.1	1	1753.5	1	1854.2	3	395.3	3	1655	3	81	3
Starcross	2014-11-20 08:30:00	2.17143	11.6	1	7.4	1	1.5	1	1.43659	3	0.153298	3
Starcross	2014-11-20 08:30:00	2.17143	11.6	1	7.5	1	1.4	1	1.35257	3	0.114648	3
Starcross	2014-11-20 09:00:00	1.84286	11.7	1	7.29	1	2.3	1	2.1764	3	0.299715	3							11.1	1
Starcross	2014-11-20 09:00:00	1.84286	11.7	1	7.54	1	2.3	1	2.22882	3	0.172602	3
Starcross	2014-11-20 09:00:00	1.84286	11.7	1	7.44	1	2.5	1	2.40337	3	0.23431	3
Starcross	2014-11-20 09:30:00	1.56429	12.2	1	7.4	1	2.4	1	2.29929	3	0.24795	3							11.1	1
Starcross	2014-11-20 09:30:00	1.56429	12.2	1	7.42	1	1.9	1	1.82372	3	0.187814	3
Starcross	2014-11-20 09:30:00	1.56429	12.2	1	7.43	1	2.3	1	2.20968	3	0.222382	3
Starcross	2014-11-20 10:00:00	1.36429	12.7	1	7.14	1	1.6	1	1.48259	3	0.293461	3							11.3	1
Starcross	2014-11-20 10:00:00	1.36429	12.7	1	7.35	1	2.5	1	2.38361	3	0.290914	3
Starcross	2014-11-20 10:00:00	1.36429	12.7	1	7.31	1	2.3	1	2.18312	3	0.29215	3
Starcross	2014-11-20 10:30:00	1.23571	12.7	1	7.54	1	2.1	1	2.03582	3	0.160424	3							11.7	1
Starcross	2014-11-20 10:30:00	1.23571	12.7	1	7.04	1	1.8	1	1.63682	3	0.407877	3
Starcross	2014-11-20 10:30:00	1.23571	12.7	1	7.25	1	1	1	0.942088	3	0.144751	3
Starcross	2014-11-20 11:00:00	1.2	13.1	1	7.21	1	2	1	1.87432	3	0.317944	3							12	1
Starcross	2014-11-20 11:00:00	1.2	13.1	1	7.28	1	2	1	1.89202	3	0.27317	3
Starcross	2014-11-20 11:00:00	1.2	13.1	1	7.28	1	1.5	1	1.41901	3	0.204877	3
Starcross	2014-11-20 11:30:00	1.25714	13.95	1	6.98	1	2.6	1	2.33678	3	0.68293	3							11.9	1
Starcross	2014-11-20 11:30:00	1.25714	13.95	1	7.22	1	2.2	1	2.06608	3	0.347461	3
Starcross	2014-11-20 11:30:00	1.25714	13.95	1	7.23	1	2	1	1.88086	3	0.309111	3
Starcross	2014-11-20 12:00:00	1.41429	12.7	1	7.23	1	1.7	1	1.59719	3	0.256972	3							11.8	1
Starcross	2014-11-20 12:00:00	1.41429	12.9	1	7.15	1	1.5	1	1.39251	3	0.270284	3
Starcross	2014-11-20 12:00:00	1.41429	13.2	1	7.14	1	2.7	2	2.50305	3	0.499711	3
Starcross	2014-11-20 12:30:00	1.67143	13.1	1	7	1	1.1	1	0.992106	3	0.272939	3							11.9	1
Starcross	2014-11-20 12:30:00	1.67143	13.2	1	7.2	1	2.8	2	2.62042	3	0.455638	3
Starcross	2014-11-20 12:30:00	1.67143	13.6	1	7.22	1	0.9	1	0.844983	3	0.141268	3
Starcross	2014-11-20 13:00:00	2	12.9	1	7.2	1	1.4	1	1.30989	3	0.226598	3							11.9	1
Starcross	2014-11-20 13:00:00	2	12.9	1	7.19	1	1.8	1	1.68162	3	0.29768	3
Starcross	2014-11-20 13:00:00	2	13.1	1	7.13	1	1.9	1	1.75825	3	0.358582	3
Starcross	2014-11-20 13:30:00	2.35714	12.5	1	7.05	1	2.2	1	2.00423	3	0.486383	3	7.94	1	12.5	1	24.6	1	11.8	1	1809.6	1	1904.5	3	467.1	3	1711.1	3	78.5	3
Starcross	2014-11-20 13:30:00	2.35714	12.5	1	7.08	1	0.6	2	0.549875	3	0.124536	3
Starcross	2014-11-20 13:30:00	2.35714	12.5	1	7.28	1	1.7	1	1.60754	3	0.229716	3
Starcross	2014-11-20 14:00:00	2.7	12.6	1	7.09	1	1.9	1	1.74477	3	0.386829	3	7.9	1	12.6	1	23.7	1	11.8	1	1764.9	1	1843.8	3	505.5	3	1674.7	3	68.5	3
Starcross	2014-11-20 14:00:00	2.7	12.6	1	7.24	1	2	1	1.88149	3	0.295314	3
Starcross	2014-11-20 14:00:00	2.7	12.6	1	7.17	1	2.3	1	2.14153	3	0.394915	3
Starcross	2014-11-20 14:30:00	2.98571	11.9	1	7.15	1	1.1	1	1.02023	3	0.194622	3	7.92	1	11.9	1	23.1	1	11.7	1	1952.8	1	2036.8	3	534.4	3	1853.4	3	75.9	3
Starcross	2014-11-20 14:30:00	2.98571	11.9	1	7.13	1	1.9	1	1.75621	3	0.350809	3
Starcross	2014-11-20 14:30:00	2.98571	11.9	1	7.35	1	1.1	1	1.04828	3	0.126175	3
Starcross	2014-11-20 15:00:00	3.22143	11.9	1	7.62	1	1.2	1	1.16903	3	0.0755648	3	8.25	1	11.9	1	23.3	1	11.7	1	1953.6	1	2161.1	3	240.4	3	1785.7	3	157.3	3
Starcross	2014-11-20 15:00:00	3.22143	11.9	1	7.61	1	1.2	1	1.16832	3	0.0772785	3
Starcross	2014-11-20 15:00:00	3.22143	11.9	1	7.48	1	0.4	1	0.385887	3	0.0344314	3
Starcross	2014-11-20 15:30:00	3.40714	12.2	1	7.55	1	0.1	1	0.0969924	3	0.00740471	3	8.24	1	12.2	1	22.8	1	11.2	1	1950.2	1	2151.2	3	247.7	3	1786.1	3	153.3	3
Starcross	2014-11-20 15:30:00	3.40714	12.2	1	7.47	1	0.3	1	0.289218	3	0.0265458	3
Starcross	2014-11-20 15:30:00	3.40714	12.2	1	7.55	1	2.2	2	2.13383	3	0.162904	3
Starcross	2014-11-20 16:00:00	3.56429	12.3	1	7.79	1	3	1	2.94747	3	0.129711	3	8.25	1	12.3	1	29.6	1	10.7	1	2009.1	1	2276.2	3	232.9	3	1806.5	3	192.8	3
Starcross	2014-11-20 16:00:00	3.56429	12.3	1	7.81	1	2.5	1	2.45817	3	0.103309	3
Starcross	2014-11-20 16:00:00	3.56429	12.3	1	7.63	1	3.2	1	3.11964	3	0.19844	3
Starcross	2014-11-20 16:30:00	3.67143	12.1	1	7.88	1	2.1	1	2.06994	3	0.0737855	3	8.28	1	12.1	1	29.4	1	10.5	1	1991.4	1	2270.8	3	214.2	3	1781.3	3	201	3
Starcross	2014-11-20 16:30:00	3.67143	12.1	1	7.61	1	2.3	1	2.23944	3	0.148646	3
Starcross	2014-11-20 16:30:00	3.67143	12.1	1	7.8	1	2.3	1	2.26053	3	0.0968778	3
Starcross	2014-11-20 17:00:00	3.72143	11.5	1	7.85	1	1.2	2	1.18147	3	0.0446541	3	8.28	1	11.5	1	28.9	1	10.6	1	1809	1	2061.5	3	195	3	1624	3	176.6	3
Starcross	2014-11-20 17:00:00	3.72143	11.5	1	7.79	1	2	1	1.96462	3	0.0852545	3
Starcross	2014-11-20 17:00:00	3.72143	11.5	1	7.81	1	2.4	1	2.35943	3	0.0977788	3
Starcross	2014-11-20 17:30:00	3.7	11.5	1	7.84	1	2.2	1	2.16525	3	0.0837426	3	8.29	1	11.5	1	26.3	1	10.7	1	1917	1	2163	3	206.5	3	1728.8	3	179.2	3
Starcross	2014-11-20 17:30:00	3.7	11.5	1	7.82	1	2.2	1	2.16364	3	0.087624	3
Starcross	2014-11-20 17:30:00	3.7	11.5	1	7.77	1	2.8	1	2.74818	3	0.124877	3
Starcross	2014-11-20 18:00:00	3.60714	10.9	1	7.81	1	1.5	2	1.47445	3	0.0604543	3	8.25	1	10.9	1	28.2	1	10.6	1	1984.2	1	2225.1	3	231.5	3	1799	3	175	3
Starcross	2014-11-20 18:00:00	3.60714	10.9	1	7.75	1	2.9	1	2.84342	3	0.133856	3
Starcross	2014-11-20 18:00:00	3.60714	10.9	1	7.82	1	1.9	1	1.86836	3	0.0748614	3
Starcross	2014-11-20 18:30:00	3.45	10.7	1	7.79	1	2.4	1	2.35711	3	0.100836	3	8.2	1	10.7	1	28	1	10.5	1	2051.4	1	2268.5	3	271.2	3	1878.6	3	160.7	3
Starcross	2014-11-20 18:30:00	3.45	10.7	1	7.8	1	2	1	1.96506	3	0.0821509	3
Starcross	2014-11-20 18:30:00	3.45	10.7	1	7.74	1	1.3	1	1.27399	3	0.061151	3
Starcross	2014-11-20 19:00:00	3.24286	10.8	1	7.7	1	2.3	1	2.24971	3	0.118616	3	8.15	1	10.8	1	28	1	10.5	1	1957.2	1	2144.9	3	292.7	3	1806	3	138.2	3
Starcross	2014-11-20 19:00:00	3.24286	10.8	1	7.7	1	1.9	1	1.85845	3	0.0979874	3
Starcross	2014-11-20 19:00:00	3.24286	10.8	1	7.8	1	2.2	1	2.16162	3	0.0905309	3
Starcross	2014-11-20 19:30:00	2.99286	11.5	1	7.69	1	2.5	1	2.44459	3	0.13355	3	8.15	1	11.5	1	27.6	1	10.5	1	1838.1	1	2020.5	3	276.8	3	1694.2	3	131.9	3
Starcross	2014-11-20 19:30:00	2.99286	11.5	1	7.78	1	1.9	1	1.86562	3	0.0828442	3
Starcross	2014-11-20 19:30:00	2.99286	11.5	1	7.79	1	2.4	1	2.35755	3	0.102305	3
Starcross	2015-04-09 07:00:00	2.24286	6	1	7.22	1	3.4	1	3.17178	3	0.460627	3							8.7	1
Starcross	2015-04-09 07:00:00	2.24286	6	1	7.15	1	2.9	1	2.67395	3	0.456247	3
Starcross	2015-04-09 07:00:00	2.24286	6	1	7.25	1	3	1	2.81122	3	0.381015	3
Starcross	2015-04-09 07:30:00	2.67143	6	1	7.27	1	2.5	1	2.34934	3	0.304083	3	8.07	1	6	1	27.6	1	9.1	1	1997.8	1	2122.8	3	354.6	3	1881.7	3	97.6	3
Starcross	2015-04-09 07:30:00	2.67143	6	1	7.22	1	1.9	1	1.77247	3	0.257409	3
Starcross	2015-04-09 07:30:00	2.67143	6	1	7.4	1	2.3	1	2.19562	3	0.210671	3
Starcross	2015-04-09 08:00:00	3.02857	7.1	1	7.61	1	2.4	1	2.33263	3	0.141102	3	8.09	1	8.7	1	27.3	1	9.6	1	2032.7	1	2181.2	3	350.1	3	1901.7	3	114.3	3
Starcross	2015-04-09 08:00:00	3.02857	7.1	1	7.55	1	2.1	1	2.0326	3	0.141169	3
Starcross	2015-04-09 08:00:00	3.02857	7.1	1	7.57	1	2.5	1	2.42326	3	0.160727	3
Starcross	2015-04-09 08:30:00	3.28571	9.5	1	7.75	1	2	1	1.96027	3	0.0899536	3	8.1	1	9.5	1	31.3	1	10.2	1	1971.2	1	2149.2	3	323.2	3	1827.4	3	129.1	3
Starcross	2015-04-09 08:30:00	3.28571	9.5	1	7.66	1	1.9	1	1.85378	3	0.104655	3
Starcross	2015-04-09 08:30:00	3.28571	9.5	1	7.62	1	2.6	1	2.53081	3	0.156661	3
Starcross	2015-04-09 09:00:00	3.45	11.9	1	7.59	1	2.4	1	2.33375	3	0.16164	3	8.14	1	11.9	1	32.2	1	10.9	1	2087.6	1	2316.9	3	311.9	3	1908.2	3	166.3	3
Starcross	2015-04-09 09:00:00	3.45	11.9	1	7.67	1	2.6	1	2.54002	3	0.14633	3
Starcross	2015-04-09 09:00:00	3.45	11.9	1	7.49	1	2.4	1	2.31718	3	0.202048	3
Starcross	2015-04-09 09:30:00	3.55714	12.9	1	7.73	1	2.2	1	2.15622	3	0.110082	3	8.2	1	12.9	1	32.9	1	11.5	1	2107.8	1	2387.3	3	271.1	3	1896.1	3	200.8	3
Starcross	2015-04-09 09:30:00	3.55714	13.9	1	7.62	1	2.1	1	2.04714	3	0.136944	3
Starcross	2015-04-09 09:30:00	3.55714	14.9	1	7.59	1	1.8	1	1.75213	3	0.127702	3
Starcross	2015-04-09 10:00:00	3.62143	14.2	1	7.59	1	2.3	1	2.23831	3	0.161249	3	8.2	1	14.2	1	32.9	1	12.4	1	2065.2	1	2353.4	3	266.7	3	1848.9	3	206	3
Starcross	2015-04-09 10:00:00	3.62143	14.2	1	7.76	1	2.1	1	2.06158	3	0.100411	3
Starcross	2015-04-09 10:00:00	3.62143	14.2	1	7.65	1	2	1	1.95311	3	0.122548	3
Starcross	2015-04-09 10:30:00	3.65	14.2	1	7.76	1	2.7	1	2.65061	3	0.129099	3	8.19	1	14.2	1	33	1	12.9	1	2067.5	1	2350.5	3	273.6	3	1854.5	3	202.4	3
Starcross	2015-04-09 10:30:00	3.65	14.9	1	7.57	1	3	1	2.91657	3	0.222588	3
Starcross	2015-04-09 10:30:00	3.65	15	1	7.58	1	2.9	1	2.82123	3	0.210759	3
Starcross	2015-04-09 11:00:00	3.62857	15.6	1	7.58	1	2.2	1	2.14069	3	0.161501	3	8.16	1	15.6	1	31	1	13.1	1	1992.4	1	2247.9	3	289.5	3	1797.7	3	183.9	3
Starcross	2015-04-09 11:00:00	3.62857	15.6	1	7.77	1	2.3	1	2.25958	3	0.110065	3
Starcross	2015-04-09 11:00:00	3.62857	15.6	1	7.78	1	2.4	1	2.35876	3	0.112281	3
Starcross	2015-04-09 11:30:00	3.53571	15.8	1	7.63	1	0.8	2	0.780768	3	0.0526696	3	8.15	1	15.8	1	29.8	1	13.9	1	1937.8	1	2175.5	3	291.6	3	1755.4	3	171.4	3
Starcross	2015-04-09 11:30:00	3.53571	15.8	1	7.59	1	2.1	1	2.04477	3	0.151246	3
Starcross	2015-04-09 11:30:00	3.53571	15.8	1	7.66	1	1.5	1	1.46629	3	0.0923121	3
Starcross	2015-04-09 12:00:00	3.37143	18.5	1	7.51	1	1.1	1	1.06652	3	0.0990234	3	8.26	1	18.5	1	27.8	1	13.9	1	1900.7	1	2205.8	3	222.3	3	1671.8	3	221	3
Starcross	2015-04-09 12:00:00	3.37143	18.5	1	7.56	1	1.9	1	1.84828	3	0.152946	3
Starcross	2015-04-09 12:00:00	3.37143	18.5	1	7.69	1	1.9	1	1.86139	3	0.114185	3
Starcross	2015-04-09 12:30:00	3.14286	17.3	1	7.48	1	2.4	1	2.32076	3	0.226546	3	8.36	1	17.3	1	29.8	1	13.9	1	1876.8	1	2255.1	3	165.8	3	1602.1	3	268.8	3
Starcross	2015-04-09 12:30:00	3.14286	17.3	1	7.73	1	2.3	1	2.25667	3	0.123878	3
Starcross	2015-04-09 12:30:00	3.14286	17.3	1	7.59	1	2.3	1	2.24061	3	0.169783	3
Starcross	2015-04-09 13:00:00	2.87857	16.2	1	7.52	1	2.4	1	2.32654	3	0.203502	3	8.16	1	16.2	1	30	1	13.9	1	1953	1	2202.3	3	286.6	3	1762.5	3	179.8	3
Starcross	2015-04-09 13:00:00	2.87857	16.2	1	7.63	1	2.5	1	2.44019	3	0.165684	3
Starcross	2015-04-09 13:00:00	2.87857	16.2	1	7.6	1	2.3	1	2.24114	3	0.163052	3
Starcross	2015-04-09 13:30:00	2.57143	16.4	1	7.5	1	2.6	1	2.51699	3	0.231283	3	8.09	1	16.4	1	29.6	1	14.3	1	2086.3	1	2307.5	3	365.7	3	1907.6	3	165.2	3
Starcross	2015-04-09 13:30:00	2.57143	16.4	1	7.66	1	1.9	1	1.85762	3	0.118091	3
Starcross	2015-04-09 13:30:00	2.57143	17.2	1	7.49	1	1.8	1	1.74181	3	0.165896	3
Starcross	2015-04-09 14:00:00	2.24286	19.3	1	7.35	1	1.8	2	1.7226	3	0.23409	3							13.9	1
Starcross	2015-04-09 14:00:00	2.24286	18.4	1	7.34	1	3.1	1	2.96227	3	0.406174	3
Starcross	2015-04-09 14:00:00	2.24286	17.4	1	7.3	1	2.8	1	2.66256	3	0.394021	3
Starcross	2015-04-09 14:30:00	1.9	16.9	1	7.26	1	3	1	2.83835	3	0.456896	3							13.4	1
Starcross	2015-04-09 14:30:00	1.9	16.5	1	7.27	1	2.7	1	2.55697	3	0.399657	3
Starcross	2015-04-09 14:30:00	1.9	15.9	1	7.11	1	3.5	1	3.23635	3	0.724103	3
Starcross	2015-04-09 15:00:00	1.56429	16.2	1	7.14	1	3.1	1	2.88174	3	0.604661	3							13.6	1
Starcross	2015-04-09 15:00:00	1.56429	16	1	7.07	1	3.2	1	2.93791	3	0.721918	3
Starcross	2015-04-09 15:00:00	1.56429	16.3	1	7.12	1	3.5	1	3.24311	3	0.71371	3
Starcross	2015-04-09 15:30:00	1.27857	14.9	1	6.94	1	3.2	1	2.85198	3	0.928489	3							13.8	1
Starcross	2015-04-09 15:30:00	1.27857	15.2	1	7.13	1	2.8	1	2.59623	3	0.548427	3
Starcross	2015-04-09 15:30:00	1.27857	15.3	1	7.22	1	2.6	1	2.44426	3	0.420375	3
Starcross	2015-04-09 16:00:00	1.07143	14.2	1	7.05	1	3.1	1	2.82958	3	0.706806	3							13.6	1
Starcross	2015-04-09 16:00:00	1.07143	13.7	1	7.19	1	0.7	2	0.654402	3	0.117429	3
Starcross	2015-04-09 16:00:00	1.07143	13.5	1	7.1	1	3.1	1	2.85466	3	0.628083	3
Starcross	2015-04-09 16:30:00	0.964286	13.8	1	7.21	1	3.1	1	2.90682	3	0.498978	3							13.1	1
Starcross	2015-04-09 16:30:00	0.964286	13.7	1	7.1	1	2.9	1	2.67103	3	0.589671	3
Starcross	2015-04-09 16:30:00	0.964286	13.6	1	7.13	1	2.8	1	2.59234	3	0.5332	3
Starcross	2015-04-09 17:00:00	0.971429	13.6	1	7.21	1	3.4	1	3.18762	3	0.545335	3							12.4	1
Starcross	2015-04-09 17:00:00	0.971429	13.2	1	7.05	1	3.2	1	2.91758	3	0.71659	3
Starcross	2015-04-09 17:00:00	0.971429	13	1	7.13	1	2.8	1	2.59086	3	0.527484	3
Starcross	2015-04-09 17:30:00	1.08571	13.7	1	6.99	1	4.1	1	3.69225	3	1.05008	3							12	1
Starcross	2015-04-09 17:30:00	1.08571	13.5	1	7.04	1	4.7	1	4.27788	3	1.08066	3
Starcross	2015-04-09 17:30:00	1.08571	13.2	1	7.15	1	3.8	1	3.52867	3	0.68843	3
Starcross	2015-04-09 18:00:00	1.31429	11.8	1	6.98	1	3.8	1	3.40561	3	0.959243	3							11.4	1
Starcross	2015-04-09 18:00:00	1.31429	11.7	1	7.02	1	3.9	1	3.52701	3	0.904434	3
Starcross	2015-04-09 18:00:00	1.31429	12	1	7.01	1	3.4	1	3.06916	3	0.809607	3
Starcross	2015-04-09 18:30:00	1.64286	11.6	1	6.91	1	2.6	2	2.2879	3	0.75447	3							10.9	1
Starcross	2015-04-09 18:30:00	1.64286	11.7	1	6.86	1	3.7	1	3.20941	3	1.18959	3
Starcross	2015-04-09 18:30:00	1.64286	11.5	1	6.83	1	4.2	1	3.60757	3	1.42775	3
Starcross	2015-04-09 19:00:00	2.04286	10.2	1	7.09	1	2.6	1	2.38141	3	0.505981	3							10.8	1
Starcross	2015-04-09 19:00:00	2.04286	10.1	1	7.15	1	3.1	1	2.87024	3	0.530181	3
Starcross	2015-04-09 19:00:00	2.04286	10.1	1	7.11	1	2.2	1	2.02248	3	0.409629	3
Starcross	2015-07-23 07:15:00	1.62857	17.3	1	7.2	1	1.6	1	1.50226	3	0.279429	3							13.3	1
Starcross	2015-07-23 07:15:00	1.62857	17.1	1	7.22	1	1.6	1	1.50618	3	0.266697	3
Starcross	2015-07-23 07:15:00	1.62857	15.8	1	7.13	1	1.7	1	1.57715	3	0.336442	3
Starcross	2015-07-23 07:45:00	1.90714	15.2	1	7.15	1	1.9	1	1.76751	3	0.356566	3							12.7	1
Starcross	2015-07-23 07:45:00	1.90714	15.2	1	7.19	1	2	1	1.87203	3	0.34442	3
Starcross	2015-07-23 07:45:00	1.90714	15.2	1	7.14	1	2	1	1.85752	3	0.383452	3
Starcross	2015-07-23 08:15:00	2.21429	16.1	1	7.08	1	2.1	1	1.9318	3	0.464639	3							13.4	1
Starcross	2015-07-23 08:15:00	2.21429	16.1	1	7.14	1	2.1	1	1.95197	3	0.40891	3
Starcross	2015-07-23 08:15:00	2.21429	16.1	1	7.16	1	2.1	1	1.95818	3	0.391749	3
Starcross	2015-07-23 08:45:00	2.50714	16.1	1	7.56	1	1.9	1	1.84675	3	0.147083	3	8.11	1	16.1	1	28.7	1	13.5	1	2215.5	1	2447.5	3	371.9	3	2024.4	3	177.2	3
Starcross	2015-07-23 08:45:00	2.50714	16.1	1	7.54	1	1.6	1	1.55311	3	0.129526	3
Starcross	2015-07-23 08:45:00	2.50714	16	1	7.58	1	1.8	1	1.75171	3	0.133018	3
Starcross	2015-07-23 09:15:00	2.75	16.9	1	7.61	1	2.2	1	2.14542	3	0.154264	3	8.11	1	17.6	1	29.3	1	13.8	1	2172.1	1	2418.3	3	364.8	3	1973.3	3	185.8	3
Starcross	2015-07-23 09:15:00	2.75	17.2	1	7.62	1	2.1	1	2.04925	3	0.144687	3
Starcross	2015-07-23 09:15:00	2.75	17.4	1	7.63	1	2.3	1	2.24578	3	0.155448	3
Starcross	2015-07-23 09:45:00	2.94286	18.7	1	7.72	1	1.8	1	1.7659	3	0.101414	3	8.12	1	18.7	1	29.3	1	14.1	1	2225.9	1	2492.3	3	366.1	3	2011.2	3	202	3
Starcross	2015-07-23 09:45:00	2.94286	18.6	1	7.63	1	2.2	1	2.14889	3	0.151588	3
Starcross	2015-07-23 09:45:00	2.94286	18.6	1	7.56	1	2.1	1	2.04291	3	0.169317	3
Starcross	2015-07-23 10:15:00	3.09286	19.7	1	7.54	1	2	1	1.94388	3	0.171619	3	8.09	1	19.9	1	29.4	1	14.4	1	2235.9	1	2497	3	397.5	3	2023.7	3	199	3
Starcross	2015-07-23 10:15:00	3.09286	19.7	1	7.52	1	1.7	1	1.65012	3	0.152549	3
Starcross	2015-07-23 10:15:00	3.09286	19.7	1	7.54	1	1.9	1	1.84669	3	0.163038	3
Starcross	2015-07-23 10:45:00	3.20714	18.6	1	7.67	1	2.1	1	2.05541	3	0.132236	3	8.17	1	19.2	1	31.3	1	15.3	1	2070	1	2375.4	3	295.8	3	1837.7	3	222.3	3
Starcross	2015-07-23 10:45:00	3.20714	18.8	1	7.63	1	2.1	1	2.05133	3	0.14516	3
Starcross	2015-07-23 10:45:00	3.20714	19	1	7.61	1	1.3	2	1.26856	3	0.0942932	3
Starcross	2015-07-23 11:15:00	3.27857	19.1	1	7.67	1	1.8	1	1.76201	3	0.11425	3	8.08	1	18.7	1	27.6	1	15.4	1	2077.1	1	2295.9	3	382.9	3	1897.7	3	166.1	3
Starcross	2015-07-23 11:15:00	3.27857	19.5	1	7.65	1	2.1	1	2.05386	3	0.14032	3
Starcross	2015-07-23 11:15:00	3.27857	19.8	1	7.58	1	2	1	1.94875	3	0.157154	3
Starcross	2015-07-23 11:45:00	3.30714	19.9	1	7.53	1	1.8	1	1.74847	3	0.158452	3	8.15	1	20	1	26.5	1	16	1	1875.6	1	2116.2	3	294.9	3	1688.7	3	176.9	3
Starcross	2015-07-23 11:45:00	3.30714	20	1	7.59	1	1.7	1	1.65751	3	0.131029	3
Starcross	2015-07-23 11:45:00	3.30714	20.1	1	7.56	1	2	1	1.94659	3	0.165141	3
Starcross	2015-07-23 12:15:00	3.27857	18.5	1	7.49	1	2.4	1	2.32361	3	0.225909	3	8.2	1	19.6	1	27	1	16.4	1	1972.2	1	2251	3	271.7	3	1756.7	3	206.2	3
Starcross	2015-07-23 12:15:00	3.27857	18.4	1	7.66	1	2.1	1	2.05428	3	0.134818	3
Starcross	2015-07-23 12:15:00	3.27857	18.4	1	7.62	1	2.3	1	2.24521	3	0.161565	3
Starcross	2015-07-23 12:45:00	3.19286	19.3	1	7.47	1	1.5	1	1.45056	3	0.149532	3	8.23	1	19.9	1	27	1	16.3	1	1979.4	1	2280.2	3	252.8	3	1748.4	3	222.4	3
Starcross	2015-07-23 12:45:00	3.19286	19.3	1	7.55	1	1.7	1	1.65313	3	0.141745	3
Starcross	2015-07-23 12:45:00	3.19286	19.5	1	7.57	1	1.8	1	1.75266	3	0.143962	3
Starcross	2015-07-23 13:15:00	3.05	18.3	1	7.73	1	1.9	1	1.86464	3	0.103992	3	8.2	1	19.2	1	23.6	1	15.9	1	1977.6	1	2222.6	3	282.4	3	1780.8	3	186.8	3
Starcross	2015-07-23 13:15:00	3.05	18.4	1	7.6	1	1.9	1	1.85266	3	0.1396	3
Starcross	2015-07-23 13:15:00	3.05	18.5	1	7.77	1	2	1	1.96608	3	0.100316	3
Starcross	2015-07-23 13:45:00	2.88571	21	1	7.75	1	2.1	1	2.06384	3	0.114618	3	8.34	1	22	1	29.8	1	15.9	1	1957.7	1	2389.9	3	183	3	1638.9	3	313.1	3
Starcross	2015-07-23 13:45:00	2.88571	21	1	7.78	1	2.2	1	2.1646	3	0.11219	3
Starcross	2015-07-23 13:45:00	2.88571	21	1	7.61	1	1.5	2	1.46458	3	0.112276	3
Starcross	2015-07-23 14:15:00	2.68571	18.3	1	7.86	1	1.7	1	1.67643	3	0.0693092	3	8.17	1	18.9	1	33	1	16.1	1	2093.6	1	2413.7	3	295.3	3	1852.5	3	231.2	3
Starcross	2015-07-23 14:15:00	2.68571	18.3	1	7.65	1	1.9	1	1.85764	3	0.124557	3
Starcross	2015-07-23 14:15:00	2.68571	18.3	1	7.6	1	2	1	1.95011	3	0.146712	3
Starcross	2015-07-23 14:45:00	2.47143	19	1	7.71	1	2	1	1.96139	3	0.115806	3	8.08	1	19.1	1	32.9	1	16.1	1	2075.5	1	2338.1	3	367.8	3	1872.3	3	190.9	3
Starcross	2015-07-23 14:45:00	2.47143	19.1	1	7.74	1	2.3	1	2.25855	3	0.124646	3
Starcross	2015-07-23 14:45:00	2.47143	19.2	1	7.62	1	2.3	1	2.24574	3	0.163638	3
Starcross	2015-07-23 15:15:00	2.22857	18.5	1	7.52	1	1.6	1	1.55237	3	0.140853	3							16.3	1
Starcross	2015-07-23 15:15:00	2.22857	18.4	1	7.66	1	2.1	1	2.05428	3	0.134818	3
Starcross	2015-07-23 15:15:00	2.22857	18.3	1	7.55	1	1.9	1	1.84698	3	0.155908	3
Starcross	2015-07-23 15:45:00	1.98571	19.3	1	7.52	1	2.2	1	2.13514	3	0.196167	3							16.8	1
Starcross	2015-07-23 15:45:00	1.98571	19.9	1	7.44	1	2.1	1	2.02652	3	0.225939	3
Starcross	2015-07-23 15:45:00	1.98571	20.3	1	7.44	1	2.1	1	2.02687	3	0.227376	3
Starcross	2015-07-23 16:15:00	1.75	18.7	1	7.44	1	1.9	1	1.83257	3	0.200536	3							16.5	1
Starcross	2015-07-23 16:15:00	1.75	18.7	1	7.52	1	2.2	1	2.13467	3	0.194296	3
Starcross	2015-07-23 16:15:00	1.75	18.9	1	7.15	1	3	2	2.79963	3	0.599229	3
Starcross	2015-07-23 16:45:00	1.55714	18.2	1	7.25	1	1.7	1	1.6078	3	0.270367	3							16.2	1
Starcross	2015-07-23 16:45:00	1.55714	18.3	1	7.23	1	2.4	2	2.26421	3	0.399321	3
Starcross	2015-07-23 16:45:00	1.55714	18.5	1	7.43	1	1.8	1	1.73453	3	0.193621	3
Starcross	2015-07-23 17:15:00	1.42143	18.8	1	7.26	1	2.1	1	1.98935	3	0.330007	3							15.9	1
Starcross	2015-07-23 17:15:00	1.42143	19	1	7.15	1	2	1	1.86658	3	0.400143	3
Starcross	2015-07-23 17:15:00	1.42143	19.1	1	7.07	1	2.2	1	2.02609	3	0.523006	3
Starcross	2015-07-23 17:45:00	1.35714	18.8	1	7.16	1	2	1	1.86911	3	0.390344	3							15.3	1
Starcross	2015-07-23 17:45:00	1.35714	18.9	1	7.34	1	1.8	1	1.7205	3	0.237764	3
Starcross	2015-07-23 17:45:00	1.35714	19.1	1	7.1	1	2	1	1.85167	3	0.446079	3
Starcross	2015-07-23 18:15:00	1.37143	19.2	1	7.28	1	1.6	2	1.51967	3	0.242256	3							15.7	1
Starcross	2015-07-23 18:15:00	1.37143	19.3	1	7.07	1	2.1	1	1.93438	3	0.500888	3
Starcross	2015-07-23 18:15:00	1.37143	19.4	1	7.06	1	2.1	1	1.93102	3	0.512462	3
Starcross	2015-07-23 18:45:00	1.46429	18.4	1	7.13	1	1.9	1	1.76677	3	0.392888	3							15.7	1
Starcross	2015-07-23 18:45:00	1.46429	18.5	1	7.26	1	1.8	1	1.70482	3	0.281481	3
Starcross	2015-07-23 18:45:00	1.46429	18.7	1	7.14	1	2.3	1	2.14269	3	0.467834	3
Starcross	2015-07-23 19:15:00	1.64286	18.2	1	7.08	1	1.8	2	1.65927	3	0.412703	3							15.6	1
Starcross	2015-07-23 19:15:00	1.64286	18.1	1	7.13	1	2.5	1	2.3241	3	0.514388	3
Starcross	2015-07-23 19:15:00	1.64286	18.1	1	7.05	1	2.1	1	1.92485	3	0.512192	3
Starcross	2015-09-02 08:00:00	2.16429	14.2	1	7.2	1	2	1	1.87326	3	0.331265	3							11.3	1
Starcross	2015-09-02 08:00:00	2.16429	13.3	1	7.06	1	2	1	1.82736	3	0.439351	3
Starcross	2015-09-02 08:00:00	2.16429	12.9	1	7.15	1	2	1	1.85668	3	0.360379	3
Starcross	2015-09-02 08:30:00	2.63571	13.2	1	7.17	1	1.5	1	1.39739	3	0.260355	3	7.86	1	13.7	1	24.9	1	12.2	1	2065.3	1	2150.2	3	647.1	3	1959.6	3	79.1	3
Starcross	2015-09-02 08:30:00	2.63571	13.1	1	7.21	1	1.6	1	1.49945	3	0.254355	3
Starcross	2015-09-02 08:30:00	2.63571	13.3	1	7.31	1	2	1	1.8991	3	0.256766	3
Starcross	2015-09-02 09:00:00	3.02143	15.1	1	7.49	1	1.7	1	1.64362	3	0.151308	3	7.89	1	14.1	1	26.6	1	12.5	1	2019.7	1	2122.4	3	582.1	3	1908.4	3	88	3
Starcross	2015-09-02 09:00:00	3.02143	15.5	1	7.45	1	1.7	1	1.63867	3	0.166496	3
Starcross	2015-09-02 09:00:00	3.02143	16.1	1	7.54	1	1.7	1	1.65018	3	0.137621	3
Starcross	2015-09-02 09:30:00	3.33571	17.1	1	7.21	1	2	1	1.88016	3	0.340671	3	8.11	1	18.2	1	31.8	1	12.7	1	2028.2	1	2287.6	3	334.9	3	1828.7	3	187.9	3
Starcross	2015-09-02 09:30:00	3.33571	19.2	1	7.42	1	1.9	1	1.82993	3	0.211328	3
Starcross	2015-09-02 09:30:00	3.33571	19.5	1	7.5	1	2.1	1	2.03541	3	0.196427	3
Starcross	2015-09-02 10:00:00	3.6	17.6	1	7.63	1	2.1	1	2.05061	3	0.142391	3	8.1	1	16.7	1	31.4	1	13.1	1	2015.8	1	2252.6	3	340.5	3	1831.5	3	172	3
Starcross	2015-09-02 10:00:00	3.6	18.2	1	7.61	1	2.5	1	2.43895	3	0.179029	3
Starcross	2015-09-02 10:00:00	3.6	18.5	1	7.62	1	2.3	1	2.24528	3	0.161823	3
Starcross	2015-09-02 10:30:00	3.82143	18.8	1	7.66	1	2.1	1	2.0545	3	0.135681	3	8.11	1	17.8	1	32.6	1	13.2	1	2004.3	1	2264.3	3	328.8	3	1806.4	3	186.5	3
Starcross	2015-09-02 10:30:00	3.82143	19.3	1	7.57	1	2	1	1.94728	3	0.159451	3
Starcross	2015-09-02 10:30:00	3.82143	19.8	1	7.53	1	1.7	1	1.65128	3	0.149413	3
Starcross	2015-09-02 11:00:00	3.98571	18.8	1	7.56	1	2.1	1	2.04304	3	0.16986	3	8.09	1	18	1	31.9	1	13.7	1	2014.4	1	2260.3	3	349.2	3	1824.2	3	178.1	3
Starcross	2015-09-02 11:00:00	3.98571	19.6	1	7.64	1	2.4	1	2.34613	3	0.164277	3
Starcross	2015-09-02 11:00:00	3.98571	20.4	1	7.54	1	2.1	1	2.04156	3	0.1822	3
Starcross	2015-09-02 11:30:00	4.06429	17.2	1	7.48	1	1.7	1	1.6438	3	0.160208	3	8.08	1	17.5	1	31.4	1	14.3	1	2017.7	1	2250.5	3	359.2	3	1835.3	3	169.7	3
Starcross	2015-09-02 11:30:00	4.06429	17.5	1	7.55	1	2.1	1	2.04083	3	0.170105	3
Starcross	2015-09-02 11:30:00	4.06429	17.3	1	7.54	1	1.9	1	1.84513	3	0.156875	3
Starcross	2015-09-02 12:00:00	4.04286	19.4	1	7.58	1	2.1	1	2.04593	3	0.163971	3	8.11	1	18.5	1	31.9	1	15	1	2079.4	1	2346.7	3	343.5	3	1872.5	3	195.1	3
Starcross	2015-09-02 12:00:00	4.04286	20.5	1	7.59	1	2.3	1	2.24285	3	0.178671	3
Starcross	2015-09-02 12:00:00	4.04286	21.4	1	7.57	1	2.1	1	2.046	3	0.173032	3
Starcross	2015-09-02 12:30:00	3.94286	19.3	1	7.46	1	2	1	1.93259	3	0.203864	3	8.08	1	19.3	1	31.9	1	14.4	1	2157	1	2420.5	3	385	3	1948.9	3	195.3	3
Starcross	2015-09-02 12:30:00	3.94286	19.7	1	7.56	1	2.1	1	2.04365	3	0.172307	3
Starcross	2015-09-02 12:30:00	3.94286	19.8	1	7.57	1	2	1	1.94759	3	0.160718	3
Starcross	2015-09-02 13:00:00	3.75714	21.1	1	7.54	1	2.2	1	2.13928	3	0.192977	3	8.1	1	19.6	1	31.2	1	13.9	1	2143.8	1	2415.2	3	366.1	3	1930.3	3	201.2	3
Starcross	2015-09-02 13:00:00	3.75714	22.3	1	7.62	1	2	1	1.95452	3	0.149336	3
Starcross	2015-09-02 13:00:00	3.75714	22.5	1	7.54	1	1.8	1	1.75113	3	0.161341	3
Starcross	2015-09-02 13:30:00	3.49286	21.9	1	7.44	1	1.8	1	1.73848	3	0.199838	3	8.2	1	19.8	1	32.1	1	15.2	1	2091.8	1	2433.8	3	275.6	3	1834.6	3	248.1	3
Starcross	2015-09-02 13:30:00	3.49286	21.5	1	7.62	1	1.7	1	1.66098	3	0.125384	3
Starcross	2015-09-02 13:30:00	3.49286	21.5	1	7.68	1	2	1	1.9599	3	0.128858	3
Starcross	2015-09-02 14:00:00	3.15714	20.3	1	7.61	1	2	1	1.95238	3	0.148075	3	8.35	1	19.2	1	32.9	1	16	1	1609.5	1	1996.2	3	142.3	3	1347.9	3	256.8	3
Starcross	2015-09-02 14:00:00	3.15714	20.8	1	7.55	1	2	1	1.94583	3	0.170747	3
Starcross	2015-09-02 14:00:00	3.15714	20.9	1	7.57	1	2.3	1	2.24051	3	0.188044	3
Starcross	2015-09-02 14:30:00	2.73571	20.4	1	7.62	1	2.7	1	2.63721	3	0.195763	3	8.12	1	20.1	1	32.5	1	16.1	1	1724.9	1	1983.9	3	277.9	3	1538.9	3	176.8	3
Starcross	2015-09-02 14:30:00	2.73571	20.9	1	7.6	1	1.7	2	1.65889	3	0.129936	3
Starcross	2015-09-02 14:30:00	2.73571	21.1	1	7.57	1	2.4	1	2.33807	3	0.196832	3
Starcross	2015-09-02 15:00:00	2.25714	25	1	7.28	1	1.8	1	1.71544	3	0.298359	3							15.8	1
Starcross	2015-09-02 15:00:00	2.25714	25.7	1	7.39	1	2	1	1.92687	3	0.262747	3
Starcross	2015-09-02 15:00:00	2.25714	25.4	1	7.31	1	2	1	1.91244	3	0.312197	3
Starcross	2015-09-02 15:30:00	1.76429	25.4	1	7.33	1	2.1	1	2.01202	3	0.313671	3							15.7	1
Starcross	2015-09-02 15:30:00	1.76429	25.7	1	7.4	1	2.6	2	2.50702	3	0.334074	3
Starcross	2015-09-02 15:30:00	1.76429	25.5	1	7.34	1	2.1	1	2.01404	3	0.307274	3
Starcross	2015-09-02 16:00:00	1.29286	24.7	1	7.33	1	1.7	1	1.62821	3	0.251305	3							14.4	1
Starcross	2015-09-02 16:00:00	1.29286	24.9	1	7.05	1	2.1	1	1.93761	3	0.571487	3
Starcross	2015-09-02 16:00:00	1.29286	24.9	1	7.15	1	1.9	1	1.78141	3	0.417353	3
Starcross	2015-09-02 16:30:00	0.892857	23.9	1	6.98	1	2.1	1	1.90971	3	0.652237	3							15.3	1
Starcross	2015-09-02 16:30:00	0.892857	24.3	1	7.06	1	2.2	1	2.03236	3	0.580729	3
Starcross	2015-09-02 16:30:00	0.892857	24.2	1	7.07	1	1.9	1	1.75811	3	0.490216	3
Starcross	2015-09-02 17:00:00	0.585714	22	1	7.05	1	2.4	1	2.2084	3	0.624081	3							14.2	1
Starcross	2015-09-02 17:00:00	0.585714	21.7	1	7.11	1	1.9	1	1.76607	3	0.432715	3
Starcross	2015-09-02 17:00:00	0.585714	21.8	1	7.14	1	2.1	1	1.96135	3	0.449166	3
Starcross	2015-09-02 17:30:00	0.4	19.3	1	6.93	1	2.7	1	2.41461	3	0.863073	3							14.6	1
Starcross	2015-09-02 17:30:00	0.4	19.4	1	6.97	1	2.7	1	2.43757	3	0.795853	3
Starcross	2015-09-02 17:30:00	0.4	18.9	1	7.08	1	1.9	2	1.75263	3	0.440739	3
Starcross	2015-09-02 18:00:00	0.371429	19.5	1	6.96	1	2.2	1	1.98193	3	0.663188	3							14.2	1
Starcross	2015-09-02 18:00:00	0.371429	19.4	1	7.03	1	2.3	1	2.10282	3	0.597968	3
Starcross	2015-09-02 18:00:00	0.371429	19.4	1	7.04	1	2.2	1	2.01533	3	0.560043	3
Starcross	2015-09-02 18:30:00	0.528571	18.1	1	6.97	1	2	1	1.80278	3	0.576737	3							14	1
Starcross	2015-09-02 18:30:00	0.528571	18.5	1	7.06	1	2.1	1	1.92929	3	0.504856	3
Starcross	2015-09-02 18:30:00	0.528571	18.5	1	6.95	1	2.3	1	2.06465	3	0.696012	3
Starcross	2015-09-02 19:00:00	0.871429	18.9	1	7.01	1	2.1	2	1.91119	3	0.56467	3							13.6	1
Starcross	2015-09-02 19:00:00	0.871429	18.7	1	7.03	1	2.5	1	2.28398	3	0.642429	3
Starcross	2015-09-02 19:00:00	0.871429	18.6	1	7	1	2.7	1	2.45127	3	0.737638	3
Starcross	2015-09-02 19:30:00	1.35714	17.1	1	7.03	1	2.7	1	2.46243	3	0.675314	3							13.1	1
Starcross	2015-09-02 19:30:00	1.35714	16.6	1	7.15	1	2.6	1	2.42166	3	0.499773	3
Starcross	2015-09-02 19:30:00	1.35714	17.3	1	7.17	1	2.4	1	2.24358	3	0.447167	3
Starcross	2015-09-02 20:00:00	1.9	16.1	1	7.01	1	2.2	1	1.99583	3	0.563998	3							12.2	1
Starcross	2015-09-02 20:00:00	1.9	15.8	1	7.09	1	2	1	1.84262	3	0.430997	3
Starcross	2015-09-02 20:00:00	1.9	15.8	1	7.14	1	2.1	1	1.95145	3	0.406814	3
Port Gaverne	2015-04-21 08:00:00	6.9875	12.8	1	7.5	1	1.6	1	1.54661	3	0.133861	3	8.14	1	12.8	1	32.4	1	10.6	1	2064.2	1	2300.8	3	309.2	3	1881	3	170.7	3
Port Gaverne	2015-04-21 08:00:00	6.9875	12.8	1	7.7	1	2	1	1.95736	3	0.106893	3
Port Gaverne	2015-04-21 08:00:00	6.9875	12.8	1	7.66	1	2.3	1	2.24635	3	0.134509	3
Port Gaverne	2015-04-21 08:30:00	7.0125	11.5	1	7.63	1	1.7	1	1.65688	3	0.103927	3	8.16	1	11.65	1	32.6	1	11.2	1	2069	1	2307.1	3	293	3	1885.6	3	171.1	3
Port Gaverne	2015-04-21 08:30:00	7.0125	11.5	1	7.75	1	2.1	1	2.05934	3	0.0979865	3
Port Gaverne	2015-04-21 08:30:00	7.0125	11.9	1	7.74	1	1.8	1	1.76454	3	0.0865218	3
Port Gaverne	2015-04-21 09:00:00	6.8875	11.1	1	7.52	1	2.1	1	2.03153	3	0.162995	3	8.1	1	11.1	1	32.6	1	11.9	1	2035.5	1	2237.2	3	333.7	3	1875.4	3	145.9	3
Port Gaverne	2015-04-21 09:00:00	6.8875	11.1	1	7.55	1	2.2	1	2.13291	3	0.159707	3
Port Gaverne	2015-04-21 09:00:00	6.8875	11.1	1	7.75	1	2.3	1	2.25524	3	0.106548	3
Port Gaverne	2015-04-21 09:30:00	6.6375	11.3	1	7.71	1	1.5	1	1.46813	3	0.0763246	3	8.21	1	11.3	1	30.7	1	12.4	1	2048.8	1	2296.6	3	259.3	3	1858.7	3	178.9	3
Port Gaverne	2015-04-21 09:30:00	6.6375	11.3	1	7.84	1	1.9	1	1.86991	3	0.0720643	3
Port Gaverne	2015-04-21 09:30:00	6.6375	11.3	1	7.79	1	2.3	1	2.25921	3	0.0976913	3
Port Gaverne	2015-04-21 10:00:00	6.2625	12.1	1	7.73	1	2.1	1	2.05779	3	0.103613	3	8.14	1	12.1	1	28.6	1	12.9	1	2043.5	1	2245.9	3	313.6	3	1879.7	3	150.5	3
Port Gaverne	2015-04-21 10:00:00	6.2625	12.1	1	7.78	1	2.2	1	2.1605	3	0.0969545	3
Port Gaverne	2015-04-21 10:00:00	6.2625	12.1	1	7.67	1	2.3	1	2.24708	3	0.129907	3
Port Gaverne	2015-04-21 10:30:00	5.75	15.4	1	7.66	1	1.9	1	1.85709	3	0.116154	3	8.14	1	17.3	1	32.4	1	13.1	1	2057.3	1	2316.1	3	311.1	3	1859	3	186.7	3
Port Gaverne	2015-04-21 10:30:00	5.75	17.8	1	7.7	1	1.9	1	1.86193	3	0.110393	3
Port Gaverne	2015-04-21 10:30:00	5.75	18.7	1	7.62	1	2.1	1	2.05016	3	0.148225	3
Port Gaverne	2015-04-21 11:00:00	5.0875	17.3	1	7.58	1	1.9	1	1.84983	3	0.143436	3	8.13	1	21	1	28.3	1	13.8	1	2054.3	1	2293.2	3	330.2	3	1864.5	3	177.9	3
Port Gaverne	2015-04-21 11:00:00	5.0875	20.6	1	7.54	1	2	1	1.94448	3	0.174069	3
Port Gaverne	2015-04-21 11:00:00	5.0875	25	1	7.46	1	1.9	1	1.84007	3	0.211445	3
Port Gaverne	2015-04-21 11:30:00	4.3125	21.1	1	7.73	1	1.6	1	1.57121	3	0.0915106	3	8.14	1	20.6	1	26.5	1	14.1	1	2042.6	1	2289.1	3	328.9	3	1845.3	3	186.1	3
Port Gaverne	2015-04-21 11:30:00	4.3125	21.1	1	7.68	1	2.1	1	2.05769	3	0.134468	3
Port Gaverne	2015-04-21 11:30:00	4.3125	19.6	1	7.68	1	2.2	1	2.15488	3	0.137609	3
Port Gaverne	2015-04-21 12:00:00	3.4875	23.4	1	7.27	1	2.2	1	2.09243	3	0.363825	3							14.6	1
Port Gaverne	2015-04-21 12:00:00	3.4875	23.8	1	7.31	1	2.2	1	2.10192	3	0.335287	3
Port Gaverne	2015-04-21 12:00:00	3.4875	26.2	1	7.42	1	1.9	1	1.83538	3	0.235205	3
Port Gaverne	2015-04-21 12:30:00	2.6625	23.1	1	7.25	1	2.3	1	2.18212	3	0.395539	3							14.7	1
Port Gaverne	2015-04-21 12:30:00	2.6625	21.6	1	7.39	1	2.7	1	2.59653	3	0.333374	3
Port Gaverne	2015-04-21 12:30:00	2.6625	22.3	1	7.25	1	2.8	1	2.65518	3	0.475572	3
Port Gaverne	2015-04-21 13:00:00	1.925	21.1	1	7.2	1	2.6	1	2.448	3	0.483113	3							14.8	1
Port Gaverne	2015-04-21 13:00:00	1.925	22.1	1	7.27	1	2.3	1	2.18587	3	0.37277	3
Port Gaverne	2015-04-21 13:00:00	1.925	21.6	1	7.23	1	2	1	1.89108	3	0.350951	3
Port Gaverne	2015-04-21 13:30:00	1.3125	23.4	1	7.07	2	2.5	1	2.31166	3	0.637037	3							15	1
Port Gaverne	2015-04-21 13:30:00	1.3125	24	1	7.46	1	2.1	1	2.033	3	0.230256	3
Port Gaverne	2015-04-21 13:30:00	1.3125	24.9	1	7.49	1	2.1	1	2.03798	3	0.218243	3
Port Gaverne	2015-04-21 14:00:00	0.8875	26	1	7.01	2	2.9	1	2.6588	3	0.873369	3							15.2	1
Port Gaverne	2015-04-21 14:00:00	0.8875	25.6	1	7.44	1	2.3	1	2.22467	3	0.269983	3
Port Gaverne	2015-04-21 14:00:00	0.8875	26.8	1	7.2	1	2.7	1	2.55192	3	0.547234	3
Port Gaverne	2015-04-21 14:30:00	0.6875	25.9	1	7.31	1	2.6	1	2.4868	3	0.408833	3							15.7	1
Port Gaverne	2015-04-21 14:30:00	0.6875	26.3	1	7.44	1	2.9	1	2.80576	3	0.343855	3
Port Gaverne	2015-04-21 14:30:00	0.6875	25.4	1	7.14	1	2.9	1	2.71606	3	0.655814	3
Port Gaverne	2015-04-21 15:00:00	0.7875	24.8	1	7.52	1	3.2	1	3.11153	3	0.31052	3							15.7	1
Port Gaverne	2015-04-21 15:00:00	0.7875	23.3	1	7.7	1	3.5	1	3.43433	3	0.221534	3
Port Gaverne	2015-04-21 15:00:00	0.7875	21.2	1	7.26	2	4.5	1	4.26939	3	0.734962	3
Port Gaverne	2015-04-21 15:30:00	1.225	23.8	1	7.44	1	5.9	1	5.70274	3	0.674347	3							15.9	1
Port Gaverne	2015-04-21 15:30:00	1.225	25	1	7.47	1	3	2	2.90747	3	0.326496	3
Port Gaverne	2015-04-21 15:30:00	1.225	27	1	7.51	1	5	1	4.86213	3	0.512049	3
Port Gaverne	2015-04-21 16:00:00	1.95	25.4	1	7.49	1	5.1	1	4.95025	3	0.533911	3							14.8	1
Port Gaverne	2015-04-21 16:00:00	1.95	26.2	1	7.55	1	5.4	1	5.26263	3	0.499948	3
Port Gaverne	2015-04-21 16:00:00	1.95	27.6	1	7.5	1	3.6	1	3.49917	3	0.38013	3
Port Gaverne	2015-04-21 16:30:00	2.85	26.8	1	7.42	1	2.5	1	2.41554	3	0.312119	3							13.9	1
Port Gaverne	2015-04-21 16:30:00	2.85	26.3	1	7.37	1	2.5	1	2.40509	3	0.346303	3
Port Gaverne	2015-04-21 16:30:00	2.85	26.8	1	7.49	1	6.4	2	6.21504	3	0.683518	3
Port Gaverne	2015-04-21 17:00:00	3.75	21	1	7.47	1	3.8	1	3.67723	3	0.389132	3	8.23	1	21.6	1	25.3	1	13.7	1	2033.1	1	2339.5	3	265.7	3	1792.9	3	231.6	3
Port Gaverne	2015-04-21 17:00:00	3.75	21.3	1	7.63	1	4.7	1	4.59427	3	0.337891	3
Port Gaverne	2015-04-21 17:00:00	3.75	24.5	1	7.5	1	3	1	2.91297	3	0.303088	3
Port Gaverne	2015-04-21 17:30:00	4.5625	23.3	1	7.52	1	2.7	1	2.62405	3	0.256195	3	8.21	1	18.3	1	29.4	1	13.4	1	2028.5	1	2328.9	3	265.4	3	1799.6	3	219.7	3
Port Gaverne	2015-04-21 17:30:00	4.5625	21.3	1	7.64	1	2.2	1	2.15161	3	0.154641	3
Port Gaverne	2015-04-21 17:30:00	4.5625	17.8	1	7.61	1	2.9	1	2.82884	3	0.206341	3
Port Gaverne	2015-04-21 18:00:00	5.225	18.6	1	7.57	1	1.8	1	1.75215	3	0.141913	3	8.24	1	17.8	1	28.7	1	12.9	1	2033.1	1	2341.6	3	247.7	3	1797.8	3	226.5	3
Port Gaverne	2015-04-21 18:00:00	5.225	19.8	1	7.39	1	5.4	2	5.18866	3	0.648073	3
Port Gaverne	2015-04-21 18:00:00	5.225	20.9	1	7.65	1	2.9	1	2.83734	3	0.198072	3
Port Gaverne	2015-04-21 18:30:00	5.7625	15.6	1	7.75	1	2.3	1	2.25771	3	0.115157	3	8.18	1	16	1	30.5	1	12.7	1	2010.4	1	2267	3	293.6	3	1813.5	3	186	3
Port Gaverne	2015-04-21 18:30:00	5.7625	16.3	1	7.77	1	2.3	1	2.25993	3	0.111341	3
Port Gaverne	2015-04-21 18:30:00	5.7625	17.6	1	7.76	1	2.2	1	2.16141	3	0.11126	3
Port Gaverne	2015-04-21 19:00:00	6.225	16.7	1	7.86	1	2.2	1	2.16889	3	0.0874172	3	8.11	1	16.2	1	31.1	1	12.6	1	1994.2	1	2228.2	3	328.7	3	1812.5	3	169.5	3
Port Gaverne	2015-04-21 19:00:00	6.225	17.7	1	7.52	1	1.7	1	1.64891	3	0.147735	3
Port Gaverne	2015-04-21 19:00:00	6.225	18.3	1	7.64	1	2.1	1	2.05212	3	0.140802	3
Port Gaverne	2015-04-21 19:30:00	6.5875	15	1	7.8	1	1.7	1	1.67187	3	0.0752576	3	8.23	1	15.3	1	30.3	1	12.7	1	1981.1	1	2268	3	242.5	3	1765.8	3	206.1	3
Port Gaverne	2015-04-21 19:30:00	6.5875	15.2	1	7.78	1	1.9	1	1.86719	3	0.0883009	3
Port Gaverne	2015-04-21 19:30:00	6.5875	15.3	1	7.72	1	2.2	1	2.15655	3	0.117287	3
Port Gaverne	2015-04-21 20:00:00	6.85	15.6	1	7.8	1	2.4	1	2.36059	3	0.107311	3	8.22	1	15	1	26.9	1	13.4	1	1969.1	1	2236.5	3	256.3	3	1762.4	3	197.3	3
Port Gaverne	2015-04-21 20:00:00	6.85	14.8	1	7.64	1	2.2	1	2.14764	3	0.139275	3
Port Gaverne	2015-04-21 20:00:00	6.85	14	1	7.7	1	1.8	1	1.7622	3	0.0982153	3
Port Gaverne	2015-07-15 09:00:00	4.275	18.5	1	7.2	1	2.1	1	1.9735	3	0.374116	3	7.63	2	18.5	2	22.8	2	15.4	1
Port Gaverne	2015-07-15 09:00:00	4.275	18.5	1	7.36	1	2	1	1.91507	3	0.251163	3
Port Gaverne	2015-07-15 09:00:00	4.275	18.5	1	7.29	1	2	1	1.90095	3	0.292915	3
Port Gaverne	2015-07-15 09:30:00	3.65	20.1	1	7.46	1	2.7	1	2.60985	3	0.278738	3							15.3	1
Port Gaverne	2015-07-15 09:30:00	3.65	20.1	1	7.39	1	2.1	1	2.0181	3	0.253235	3
Port Gaverne	2015-07-15 09:30:00	3.65	22.1	1	7.52	1	2.3	1	2.23439	3	0.214278	3
Port Gaverne	2015-07-15 10:00:00	3.0125	22.7	1	7.49	1	2.5	1	2.42428	3	0.251366	3							15.9	1
Port Gaverne	2015-07-15 10:00:00	3.0125	22.5	1	7.51	1	2.2	1	2.13613	3	0.210888	3
Port Gaverne	2015-07-15 10:00:00	3.0125	22.5	1	7.39	1	2.4	1	2.30898	3	0.300501	3
Port Gaverne	2015-07-15 10:30:00	2.4375	23	1	7.27	1	2.3	1	2.18703	3	0.378026	3							15.9	1
Port Gaverne	2015-07-15 10:30:00	2.4375	22.3	1	7.24	1	1.6	1	1.51542	3	0.277751	3
Port Gaverne	2015-07-15 10:30:00	2.4375	22.4	1	7.22	1	2	1	1.88969	3	0.363217	3
Port Gaverne	2015-07-15 11:00:00	1.9375	23.1	1	7.31	1	1.8	1	1.71911	3	0.271404	3							16.5	1
Port Gaverne	2015-07-15 11:00:00	1.9375	22.9	1	7.41	1	2	1	1.92778	3	0.241033	3
Port Gaverne	2015-07-15 11:00:00	1.9375	22.6	1	7.27	1	1.9	1	1.80625	3	0.310352	3
Port Gaverne	2015-07-15 11:30:00	1.5625	24.1	1	7.28	1	1.9	1	1.80983	3	0.310703	3							17.5	1
Port Gaverne	2015-07-15 11:30:00	1.5625	24.6	1	7.35	1	2.1	1	2.01506	3	0.296585	3
Port Gaverne	2015-07-15 11:30:00	1.5625	24.6	1	7.36	1	2	1	1.92087	3	0.276287	3
Port Gaverne	2015-07-15 12:00:00	1.3625	25.4	1	7.25	1	1.9	1	1.8051	3	0.338333	3							18.2	1
Port Gaverne	2015-07-15 12:00:00	1.3625	25.4	1	7.28	1	1.6	1	1.52517	3	0.266784	3
Port Gaverne	2015-07-15 12:00:00	1.3625	24.3	1	7.35	1	2.1	1	2.01477	3	0.295256	3
Port Gaverne	2015-07-15 12:30:00	1.4125	27	1	7.4	1	2.2	1	2.12247	3	0.287956	3							19.3	1
Port Gaverne	2015-07-15 12:30:00	1.4125	27	1	7.42	1	1.8	1	1.73932	3	0.225354	3
Port Gaverne	2015-07-15 12:30:00	1.4125	27	1	7.32	1	1.7	1	1.62848	3	0.265624	3
Port Gaverne	2015-07-15 13:00:00	1.725	27.9	1	7.29	1	1.6	1	1.5288	3	0.270412	3							19.3	1
Port Gaverne	2015-07-15 13:00:00	1.725	28.8	1	7.29	1	2	1	1.91188	3	0.342066	3
Port Gaverne	2015-07-15 13:00:00	1.725	28.8	1	7.4	1	1.8	1	1.73782	3	0.241354	3
Port Gaverne	2015-07-15 13:30:00	2.2875	29.1	1	7.13	1	1.5	2	1.40661	3	0.365112	3							19.6	1
Port Gaverne	2015-07-15 13:30:00	2.2875	29.1	1	7.08	1	2.3	1	2.14054	3	0.623413	3
Port Gaverne	2015-07-15 13:30:00	2.2875	29.1	1	7.23	1	2.4	1	2.27977	3	0.470049	3
Port Gaverne	2015-07-15 14:00:00	3	27.8	1	7.13	1	2.2	1	2.0611	3	0.526268	3							19.7	1
Port Gaverne	2015-07-15 14:00:00	3	27.8	1	7.38	1	1.5	1	1.44523	3	0.207513	3
Port Gaverne	2015-07-15 14:00:00	3	27.8	1	7.12	1	1.8	1	1.68388	3	0.439965	3
Port Gaverne	2015-07-15 14:30:00	3.725	26.2	1	7.48	1	2.5	2	2.42561	3	0.270734	3	8.1	1	26.2	1	20.8	1	18.1	1	2087.9	1	2320.8	3	406	3	1888.9	3	187	3
Port Gaverne	2015-07-15 14:30:00	3.725	26.2	1	7.44	1	3.3	1	3.19264	3	0.390726	3
Port Gaverne	2015-07-15 14:30:00	3.725	26.2	1	7.39	1	3.5	1	3.37275	3	0.463133	3
Port Gaverne	2015-07-15 15:00:00	4.3875	24.2	1	7.47	1	2.4	1	2.32529	3	0.258118	3	8.22	1	23.5	1	20.7	1	16.9	1	2095.9	1	2373.3	3	299.4	3	1866.2	3	220.2	3
Port Gaverne	2015-07-15 15:00:00	4.3875	23.5	1	7.5	1	1.9	1	1.84424	3	0.189104	3
Port Gaverne	2015-07-15 15:00:00	4.3875	23.5	1	7.66	1	2.7	1	2.64468	3	0.18761	3
Port Gaverne	2015-07-15 15:30:00	4.95	22.3	1	7.42	1	1.3	1	1.25377	3	0.151824	3	8.17	1	22.3	1	21.2	1	17.3	1	2033.7	1	2271.5	3	326	3	1835.5	3	187.6	3
Port Gaverne	2015-07-15 15:30:00	4.95	22.3	1	7.44	1	1.5	1	1.44897	3	0.167565	3
Port Gaverne	2015-07-15 15:30:00	4.95	22.3	1	7.69	1	1.4	1	1.37281	3	0.089276	3
Port Gaverne	2015-07-15 16:00:00	5.425	23.9	1	7.51	1	1.8	1	1.74858	3	0.176247	3	8.14	1	23.9	1	22.4	1	18.1	1	2005.5	1	2248.7	3	343	3	1805.4	3	189.4	3
Port Gaverne	2015-07-15 16:00:00	5.425	24	1	7.52	1	1.5	1	1.45815	3	0.143838	3
Port Gaverne	2015-07-15 16:00:00	5.425	23.9	1	7.63	1	1.1	1	1.076	3	0.0822713	3
Port Gaverne	2015-07-15 16:30:00	5.8375	24.1	1	7.52	1	1.8	1	1.74983	3	0.172864	3	8.12	1	23	1	22.8	1	19.1	1	2001.7	1	2230.2	3	357.1	3	1812.5	3	177.8	3
Port Gaverne	2015-07-15 16:30:00	5.8375	23.5	1	7.63	1	1	2	0.978078	3	0.0743457	3
Port Gaverne	2015-07-15 16:30:00	5.8375	23.3	1	7.62	1	2.1	1	2.05281	3	0.159201	3
Port Gaverne	2015-07-15 17:00:00	6.1875	23.4	1	7.42	1	2	1	1.92977	3	0.237545	3	8.22	1	22.3	1	23.8	1	18.2	1	2021.8	1	2312.2	3	276.4	3	1790.8	3	222.1	3
Port Gaverne	2015-07-15 17:00:00	6.1875	22.3	1	7.51	1	1.9	1	1.84471	3	0.181573	3
Port Gaverne	2015-07-15 17:00:00	6.1875	23.1	1	7.61	1	1.9	1	1.85623	3	0.146873	3
Port Gaverne	2015-07-15 17:30:00	6.4375	21.8	1	7.61	1	1.9	1	1.85555	3	0.143988	3	8.19	1	21.8	1	24.2	1	17.7	1	1988.9	1	2257.3	3	291.6	3	1775.3	3	204.1	3
Port Gaverne	2015-07-15 17:30:00	6.4375	21.8	1	7.69	1	2	1	1.96093	3	0.126565	3
Port Gaverne	2015-07-15 17:30:00	6.4375	21.8	1	7.7	1	2	1	1.9618	3	0.123739	3
Port Gaverne	2015-07-15 18:00:00	6.5625	21.9	1	7.46	1	1.7	1	1.64443	3	0.180519	3	8.15	1	21.6	1	24.8	1	17.1	1	1966.5	1	2214	3	316.4	3	1768.8	3	187.3	3
Port Gaverne	2015-07-15 18:00:00	6.5625	21.7	1	7.52	1	1.9	1	1.84555	3	0.175922	3
Port Gaverne	2015-07-15 18:00:00	6.5625	21.3	1	7.54	1	2.1	1	2.04218	3	0.18478	3
Port Gaverne	2015-07-15 18:30:00	6.5625	21.2	1	7.45	1	1.9	1	1.83597	3	0.204063	3	8.08	1	20.3	1	24.7	1	16.3	1	1974.1	1	2175.5	3	376.8	3	1806.6	3	154.7	3
Port Gaverne	2015-07-15 18:30:00	6.5625	21	1	7.56	1	2	1	1.94716	3	0.167485	3
Port Gaverne	2015-07-15 18:30:00	6.5625	20.8	1	7.59	1	1.9	1	1.85296	3	0.148291	3
Port Gaverne	2015-07-15 19:00:00	6.4375	20.5	1	7.51	1	1.2	1	1.16433	3	0.111514	3	8.16	1	20.2	1	24.8	1	16.3	1	1977.8	1	2220.1	3	309	3	1783.8	3	183.5	3
Port Gaverne	2015-07-15 19:00:00	6.4375	19.9	1	7.51	1	1.7	1	1.64911	3	0.156491	3
Port Gaverne	2015-07-15 19:00:00	6.4375	20.2	1	7.68	1	1.6	1	1.56742	3	0.101026	3
Port Gaverne	2015-07-15 19:30:00	6.225	19.4	1	7.68	1	2.1	1	2.05682	3	0.13094	3	8.01	1	19.4	1	24.8	1	16.8	1	2003.5	1	2170.1	3	451.9	3	1856.6	3	131.2	3
Port Gaverne	2015-07-15 19:30:00	6.225	19.4	1	7.74	1	2.3	1	2.2587	3	0.125238	3
Port Gaverne	2015-07-15 19:30:00	6.225	19.4	1	7.76	1	1.6	1	1.57254	3	0.0832679	3
Port Gaverne	2015-07-15 20:00:00	5.9	18.4	1	7.51	1	1.2	1	1.16343	3	0.107852	3	8.08	1	18.4	1	24.1	1	16.5	1	2074.3	1	2264.6	3	395.5	3	1910.4	3	149.7	3
Port Gaverne	2015-07-15 20:00:00	5.9	18.4	1	7.55	1	1.9	1	1.84705	3	0.156159	3
Port Gaverne	2015-07-15 20:00:00	5.9	18.4	1	7.67	1	1.4	1	1.3702	3	0.0878765	3
Port Gaverne	2015-07-15 20:30:00	5.4625	16.9	1	7.53	1	1.4	1	1.35845	3	0.117435	3	7.42	2	17.9	2	23.9	2	15.7	1
Port Gaverne	2015-07-15 20:30:00	5.4625	17.9	1	7.66	1	1.4	1	1.36934	3	0.089161	3
Port Gaverne	2015-07-15 20:30:00	5.4625	17.9	1	7.59	1	1.4	1	1.36411	3	0.104355	3
Port Gaverne	2015-07-15 21:00:00	4.9125	17.4	1	7.26	2	1.8	1	1.70358	3	0.276428	3	7.8	2	17.4	2	25.4	2	15.5	1
Port Gaverne	2015-07-15 21:00:00	4.9125	17.4	1	7.66	1	1.3	1	1.27135	3	0.082127	3
Port Gaverne	2015-07-15 21:00:00	4.9125	17.4	1	7.61	1	1.5	1	1.46301	3	0.106039	3
Port Gaverne	2015-09-04 09:00:00	5.8125	15.5	1	7.52	1	2	1	1.93826	3	0.167619	3	8.15	1	14.7	1	22.1	1	11.9	1	2111.4	1	2295.2	3	341.2	3	1950.7	3	146.9	3
Port Gaverne	2015-09-04 09:00:00	5.8125	15.5	1	7.64	1	1.4	1	1.36697	3	0.089675	3
Port Gaverne	2015-09-04 09:00:00	5.8125	15.1	1	7.63	1	2.8	2	2.7321	3	0.182205	3
Port Gaverne	2015-09-04 09:30:00	6.125	15.6	1	7.62	1	2.5	1	2.43838	3	0.167774	3	8.15	1	14.9	1	23.8	1	12.4	1	2130.9	1	2330.1	3	338.1	3	1960.9	3	156.6	3
Port Gaverne	2015-09-04 09:30:00	6.125	15.6	1	7.51	1	2.2	1	2.13064	3	0.188856	3
Port Gaverne	2015-09-04 09:30:00	6.125	15.6	1	7.66	1	2.2	1	2.15044	3	0.134943	3
Port Gaverne	2015-09-04 10:00:00	6.3625	15.2	1	7.75	1	2	1	1.96304	3	0.0994731	3	8.21	1	15.2	1	26.1	1	12.9	1	2135.5	1	2387.3	3	285.4	3	1932.9	3	191.5	3
Port Gaverne	2015-09-04 10:00:00	6.3625	15.2	1	7.7	1	1.6	1	1.5669	3	0.0890876	3
Port Gaverne	2015-09-04 10:00:00	6.3625	15.2	1	7.63	1	2	1	1.95156	3	0.130364	3
Port Gaverne	2015-09-04 10:30:00	6.4875	15.6	1	7.74	1	2	1	1.96238	3	0.102425	3	8.17	1	15.6	1	29.7	1	13.4	1	2124.4	1	2386.5	3	304.1	3	1918.7	3	194.2	3
Port Gaverne	2015-09-04 10:30:00	6.4875	15.6	1	7.75	1	2.2	1	2.15955	3	0.11015	3
Port Gaverne	2015-09-04 10:30:00	6.4875	15.6	1	7.71	1	2.1	1	2.05773	3	0.115083	3
Port Gaverne	2015-09-04 11:00:00	6.5	15.9	1	7.56	1	2.1	1	2.04101	3	0.162028	3	8.17	1	15.9	1	29.8	1	13.9	1	2145.7	1	2413.2	3	307.2	3	1935.5	3	198.7	3
Port Gaverne	2015-09-04 11:00:00	6.5	15.9	1	7.54	1	2.1	1	2.03831	3	0.169439	3
Port Gaverne	2015-09-04 11:00:00	6.5	15.9	1	7.69	1	1.9	1	1.86014	3	0.109469	3
Port Gaverne	2015-09-04 11:30:00	6.4	15.9	1	7.48	1	2.2	1	2.12612	3	0.202923	3	8.1	1	15.7	1	31	1	14	1	2060.9	1	2290	3	347.9	3	1879.8	3	168.1	3
Port Gaverne	2015-09-04 11:30:00	6.4	15.7	1	7.63	1	2.8	2	2.7326	3	0.184038	3
Port Gaverne	2015-09-04 11:30:00	6.4	15.7	1	7.6	1	1.7	1	1.65623	3	0.119523	3
Port Gaverne	2015-09-04 12:00:00	6.175	15.7	1	7.59	1	2.1	1	2.0447	3	0.150995	3	8.1	1	15.7	1	31.2	1	14.1	1	2056.6	1	2286.8	3	346.6	3	1875.1	3	168.6	3
Port Gaverne	2015-09-04 12:00:00	6.175	15.7	1	7.36	1	1.8	1	1.72096	3	0.215825	3
Port Gaverne	2015-09-04 12:00:00	6.175	15.7	1	7.57	1	2.4	1	2.33391	3	0.180474	3
Port Gaverne	2015-09-04 12:30:00	5.85	16.1	1	7.69	1	1.8	1	1.76233	3	0.10405	3	8.16	1	16.1	1	29.8	1	13.7	1	2062.1	1	2318.4	3	303	3	1862.6	3	188.3	3
Port Gaverne	2015-09-04 12:30:00	5.85	16.1	1	7.63	1	2.3	1	2.24491	3	0.152178	3
Port Gaverne	2015-09-04 12:30:00	5.85	16.1	1	7.73	1	2.1	1	2.05985	3	0.110915	3
Port Gaverne	2015-09-04 13:00:00	5.425	16	1	7.67	1	1.6	1	1.56493	3	0.0965929	3	8.15	1	15.5	1	28.6	1	14.9	1	2055.9	1	2291.4	3	312.1	3	1869.2	3	174.8	3
Port Gaverne	2015-09-04 13:00:00	5.425	16	1	7.56	1	2.1	1	2.04108	3	0.162297	3
Port Gaverne	2015-09-04 13:00:00	5.425	15.9	1	7.77	1	2.2	1	2.16148	3	0.105802	3
Port Gaverne	2015-09-04 13:30:00	4.8875	18.2	1	7.54	1	2.2	1	2.13715	3	0.184313	3	7.97	1	16	1	29.8	1	14.7	1	2055	1	2216.4	3	481.5	3	1912.7	3	124.4	3
Port Gaverne	2015-09-04 13:30:00	4.8875	18.2	1	7.55	1	2	1	1.94413	3	0.16385	3
Port Gaverne	2015-09-04 13:30:00	4.8875	18.2	1	6.95	2	1.4	2	1.25626	3	0.421505	3
Port Gaverne	2015-09-04 14:00:00	4.25	15.4	1	7.56	1	1.9	1	1.8463	3	0.145379	3	7.64	2	15.4	2	27.8	2	15.1	1
Port Gaverne	2015-09-04 14:00:00	4.25	15.3	1	7.67	1	2	1	1.95578	3	0.119347	3
Port Gaverne	2015-09-04 14:00:00	4.25	15.3	1	7.71	1	2.3	1	2.25354	3	0.125416	3
Port Gaverne	2015-09-04 14:30:00	3.5875	19.9	1	7.57	1	2	1	1.94765	3	0.160972	3							15	1
Port Gaverne	2015-09-04 14:30:00	3.5875	19.5	1	7.49	1	1.9	1	1.84024	3	0.181729	3
Port Gaverne	2015-09-04 14:30:00	3.5875	19.5	1	7.53	1	2.1	1	2.0396	3	0.183694	3
Port Gaverne	2015-09-04 15:00:00	2.9375	22.3	1	7.43	1	2.3	1	2.22	3	0.26271	3							15.2	1
Port Gaverne	2015-09-04 15:00:00	2.9375	22.2	1	7.38	1	2.1	1	2.01829	3	0.267581	3
Port Gaverne	2015-09-04 15:00:00	2.9375	22.2	1	7.41	1	1.8	1	1.73447	3	0.214604	3
Port Gaverne	2015-09-04 15:30:00	2.3625	19.6	1	7.1	1	2.1	1	1.94514	3	0.472253	3							15.2	1
Port Gaverne	2015-09-04 15:30:00	2.3625	19.6	1	7.37	1	2.2	1	2.1098	3	0.275083	3
Port Gaverne	2015-09-04 15:30:00	2.3625	19.6	1	7.44	1	2.1	1	2.02626	3	0.224864	3
Port Gaverne	2015-09-04 16:00:00	1.9125	18.7	1	7.22	1	2.1	1	1.97914	3	0.359426	3							15.1	1
Port Gaverne	2015-09-04 16:00:00	1.9125	18.7	1	7.25	1	2.2	1	2.08138	3	0.352764	3
Port Gaverne	2015-09-04 16:00:00	1.9125	18.6	1	7.38	1	2	1	1.91883	3	0.240707	3
Port Gaverne	2015-09-04 16:30:00	1.6125	18.9	1	7.27	1	2.1	1	1.99186	3	0.323408	3							14.4	1
Port Gaverne	2015-09-04 16:30:00	1.6125	18.9	1	7.3	1	1.7	1	1.61802	3	0.245175	3
Port Gaverne	2015-09-04 16:30:00	1.6125	18.7	1	7.31	1	1.7	1	1.61961	3	0.23908	3
Port Gaverne	2015-09-04 17:00:00	1.4875	18.8	1	7.21	1	2.2	1	2.07076	3	0.385427	3							14	1
Port Gaverne	2015-09-04 17:00:00	1.4875	18.3	1	7.18	1	2.4	1	2.24869	3	0.444974	3
Port Gaverne	2015-09-04 17:00:00	1.4875	18.1	1	7.27	1	2.2	1	2.08564	3	0.334408	3
Port Gaverne	2015-09-04 17:30:00	1.5875	19.1	1	7.34	1	2.1	1	2.00747	3	0.278289	3							14	1
Port Gaverne	2015-09-04 17:30:00	1.5875	18.2	1	7.35	1	1.8	1	1.72158	3	0.229958	3
Port Gaverne	2015-09-04 17:30:00	1.5875	18.4	1	7.01	1	2.8	2	2.54683	3	0.746601	3
Port Gaverne	2015-09-04 18:00:00	1.925	18.4	1	7.22	1	2	1	1.88449	3	0.34063	3							13.8	1
Port Gaverne	2015-09-04 18:00:00	1.925	18.4	1	7.15	1	2.3	1	2.1455	3	0.455634	3
Port Gaverne	2015-09-04 18:00:00	1.925	18.3	1	7.16	1	2	1	1.86836	3	0.387137	3
Port Gaverne	2015-09-04 18:30:00	2.4875	17.3	1	7.16	1	1.8	1	1.68014	3	0.342667	3							13.8	1
Port Gaverne	2015-09-04 18:30:00	2.4875	17.5	1	7.2	1	2	1	1.87811	3	0.350454	3
Port Gaverne	2015-09-04 18:30:00	2.4875	17.9	1	7.21	1	2.9	2	2.72785	3	0.500592	3
Port Gaverne	2015-09-04 19:00:00	3.1875	16.1	1	7.25	1	2.6	1	2.45546	3	0.399288	3							13.6	1
Port Gaverne	2015-09-04 19:00:00	3.1875	16.1	1	7.28	1	2.7	1	2.55939	3	0.388411	3
Port Gaverne	2015-09-04 19:00:00	3.1875	15.9	1	7.13	1	3.6	2	3.34015	3	0.713691	3
Port Gaverne	2015-09-04 19:30:00	3.9125	15.4	1	7.76	1	1.9	2	1.86576	3	0.0926951	3	8.28	1	15.4	1	24.1	1	13.4	1	2072.2	1	2342	3	237.6	3	1857.2	3	205.7	3
Port Gaverne	2015-09-04 19:30:00	3.9125	15.3	1	7.66	1	2.4	1	2.34573	3	0.146477	3
Port Gaverne	2015-09-04 19:30:00	3.9125	15.3	1	7.41	1	2.7	1	2.59331	3	0.287968	3
Port Gaverne	2015-09-04 20:00:00	4.5625	15.1	1	7.38	1	2.5	2	2.39419	3	0.283937	3	8.24	1	15.1	1	26.7	1	13	1	2072	1	2339.7	3	255.2	3	1861.8	3	200.2	3
Port Gaverne	2015-09-04 20:00:00	4.5625	15	1	7.43	1	1.1	1	1.05827	3	0.111671	3
Port Gaverne	2015-09-04 20:00:00	4.5625	15	1	7.55	1	1.7	1	1.65062	3	0.132128	3
Port Gaverne	2015-09-04 20:30:00	5.1	15.1	1	7.75	1	2	1	1.96299	3	0.0993073	3	8.2	1	15.1	1	27.5	1	12.7	1	2058.9	1	2309.6	3	278.2	3	1861.4	3	186.7	3
Port Gaverne	2015-09-04 20:30:00	5.1	14.7	1	7.73	1	1.9	1	1.86304	3	0.0980425	3
Port Gaverne	2015-09-04 20:30:00	5.1	14.8	1	7.7	1	1.8	1	1.76258	3	0.0995543	3
Port Gaverne	2015-09-04 21:00:00	5.5125	14.8	1	7.72	1	2.2	1	2.15628	3	0.11631	3	8.11	1	15.1	1	27.6	1	12.2	1	2080.8	1	2287	3	351.2	3	1911	3	156.2	3
Port Gaverne	2015-09-04 21:00:00	5.5125	14.8	1	7.78	1	2.2	1	2.16182	3	0.101562	3
Port Gaverne	2015-09-04 21:00:00	5.5125	14.8	1	7.72	1	2.2	1	2.15628	3	0.11631	3

## Sheet: LabDataBiol
Experiment	Treatment.Time	Size	ShellLength	Treatment.Temp	Treatment.pH	H.pH	QC	H.TCO2	QC	H.[HCO3]	QC	H.pCO2	QC
Emersion	00:00:00	Large	71.1	7	pH 8.10	7.47	1	2.5	1	2.40992	3	0.220424	3
Emersion	00:00:00	Large	65.8	7	pH 8.10	7.51	1	2.7	1	2.60919	3	0.211536	3
Emersion	00:00:00	Large	72.2	7	pH 8.10	7.62	1	2.5	1	2.4339	3	0.152059	3
Emersion	00:00:00	Small	44.1	7	pH 8.10	7.57	1	2.1	1	2.03766	3	0.142051	3
Emersion	00:00:00	Small	42	7	pH 8.10	7.57	1	1.9	1	1.84316	3	0.127064	3
Emersion	00:00:00	Small	43.5	7	pH 8.10	7.35	1	2.5	1	2.37829	3	0.272096	3
Emersion	00:00:00	Large	68.4	7	pH 7.70	7.39	1	2.3	1	2.19705	3	0.22795	3
Emersion	00:00:00	Large	69.7	7	pH 7.70	7.35	1	2.6	1	2.47197	3	0.278017	3
Emersion	00:00:00	Large	72.3	7	pH 7.70	7.38	1	2.7	1	2.57504	3	0.268716	3
Emersion	00:00:00	Small	43.6	7	pH 7.70	7.4	1	2.9	1	2.7709	3	0.273993	3
Emersion	00:00:00	Small	42	7	pH 7.70	7.49	1	2.2	1	2.11952	3	0.169686	3
Emersion	00:00:00	Small	42.3	7	pH 7.70	7.4	1	2.3	1	2.19709	3	0.215544	3
Emersion	00:45:00	Large	73.2	7	pH 8.10	7.53	1	3.2	1	3.09911	3	0.246884	3
Emersion	00:45:00	Large	66.8	7	pH 8.10	7.57	1	2.8	1	2.71834	3	0.194382	3
Emersion	00:45:00	Large	69.1	7	pH 8.10	7.53	1	2.8	1	2.71027	3	0.210984	3
Emersion	00:45:00	Small	44.5	7	pH 8.10	7.5	1	2.2	1	2.12328	3	0.17262	3
Emersion	00:45:00	Small	44.1	7	pH 8.10	7.51	1	2	1	1.93126	3	0.151711	3
Emersion	00:45:00	Small	44.2	7	pH 8.10	7.58	1	2.3	1	2.23167	3	0.14694	3
Emersion	00:45:00	Large	72.4	7	pH 7.70	7.47	1	2.9	1	2.78967	3	0.235706	3
Emersion	00:45:00	Large	65	7	pH 7.70	7.41	1	2.6	1	2.48677	3	0.240301	3
Emersion	00:45:00	Large	60.9	7	pH 7.70	7.45	1	2.1	1	2.01584	3	0.176256	3
Emersion	00:45:00	Small	45.2	7	pH 7.70	7.49	1	2.6	1	2.50464	3	0.199725	3
Emersion	00:45:00	Small	39.3	7	pH 7.70	7.5	1	2.6	1	2.50673	3	0.195342	3
Emersion	00:45:00	Small	42.9	7	pH 7.70	7.41	1	2.9	1	2.77306	3	0.265857	3
Emersion	01:30:00	Large	69.3	7	pH 8.10	7.5	1	2.9	1	2.80114	3	0.235335	3
Emersion	01:30:00	Large	76.4	7	pH 8.10	7.52	1	2.7	1	2.6113	3	0.207264	3
Emersion	01:30:00	Large	64.2	7	pH 8.10	7.42	1	2.6	1	2.49297	3	0.247752	3
Emersion	01:30:00	Small	44.1	7	pH 8.10	7.53	1	2.8	1	2.70866	3	0.205512	3
Emersion	01:30:00	Small	47	7	pH 8.10	7.58	1	2.7	1	2.62061	3	0.175218	3
Emersion	01:30:00	Small	47.1	7	pH 8.10	7.6	1	2.8	1	2.72045	3	0.171061	3
Emersion	01:30:00	Large	63.1	7	pH 7.70	7.34	1	2.5	1	2.3737	3	0.271603	3
Emersion	01:30:00	Large	62	7	pH 7.70	7.54	1	2.7	1	2.61184	3	0.187096	3
Emersion	01:30:00	Large	75.8	7	pH 7.70	7.32	1	2.7	1	2.55605	3	0.30148	3
Emersion	01:30:00	Small	46.9	7	pH 7.70	7.47	1	2.6	1	2.50032	3	0.208777	3
Emersion	01:30:00	Small	44.9	7	pH 7.70	7.47	1	2.6	1	2.50032	3	0.208777	3
Emersion	01:30:00	Small	46.8	7	pH 7.70	7.48	1	2.7	1	2.59875	3	0.212057	3
Emersion	02:15:00	Large	69.1	7	pH 8.10	7.4	1	2.9	1	2.77801	3	0.29853	3
Emersion	02:15:00	Large	68.4	7	pH 8.10	7.19	1	2.9	1	2.70413	3	0.460536	3
Emersion	02:15:00	Large	75.2	7	pH 8.10	7.43	1	3	1	2.87996	3	0.282243	3
Emersion	02:15:00	Small	43.7	7	pH 8.10	7.59	1	2.6	1	2.52466	3	0.163077	3
Emersion	02:15:00	Small	44.6	7	pH 8.10	7.47	1	2.7	1	2.59728	3	0.219451	3
Emersion	02:15:00	Small	42.8	7	pH 8.10	7.58	1	2.5	1	2.42553	3	0.159084	3
Emersion	02:15:00	Large	65.7	7	pH 7.70	7.48	1	2.6	1	2.50325	3	0.206692	3
Emersion	02:15:00	Large	72.1	7	pH 7.70	7.41	1	2.6	1	2.48517	3	0.234933	3
Emersion	02:15:00	Large	77.2	7	pH 7.70	7.42	1	2.6	1	2.48767	3	0.229817	3
Emersion	02:15:00	Small	42.2	7	pH 7.70	7.42	1	2.4	1	2.29631	3	0.212138	3
Emersion	02:15:00	Small	47.3	7	pH 7.70	7.41	1	3.1	1	2.96308	3	0.280113	3
Emersion	02:15:00	Small	42.7	7	pH 7.70	7.4	1	2.8	1	2.67358	3	0.258632	3
Emersion	03:00:00	Large	67.5	7	pH 8.10	7.12	1	2.4	1	2.21468	3	0.453489	3
Emersion	03:00:00	Large	72.1	7	pH 8.10	7.26	1	2.7	1	2.54436	3	0.372801	3
Emersion	03:00:00	Large	70	7	pH 8.10	7.26	1	2.5	1	2.35356	3	0.33685	3
Emersion	03:00:00	Small	39.3	7	pH 8.10	7.46	1	2.2	1	2.11689	3	0.191166	3
Emersion	03:00:00	Small	40.8	7	pH 8.10	7.5	1	2.6	1	2.50909	3	0.203224	3
Emersion	03:00:00	Small	41.3	7	pH 8.10	7.46	1	2.3	1	2.21212	3	0.196457	3
Emersion	03:00:00	Large	68.3	7	pH 7.70	7.46	1	3.4	1	3.26741	3	0.281399	3
Emersion	03:00:00	Large	76	7	pH 7.70	7.43	1	2.7	1	2.58706	3	0.237332	3
Emersion	03:00:00	Large	73.9	7	pH 7.70	7.48	1	3.2	1	3.08	3	0.251327	3
Emersion	03:00:00	Small	46.7	7	pH 7.70	7.43	1	2.1	1	2.01204	3	0.184215	3
Emersion	03:00:00	Small	43.2	7	pH 7.70	7.45	1	2.4	1	2.30357	3	0.200614	3
Emersion	03:00:00	Small	44.5	7	pH 7.70	7.4	1	2.4	1	2.29234	3	0.223994	3
Emersion	03:45:00	Large	67.3	7	pH 8.10	7.29	1	2.8	1	2.6519	3	0.373527	3
Emersion	03:45:00	Large	74.2	7	pH 8.10	7.3	1	2.6	1	2.46379	3	0.333318	3
Emersion	03:45:00	Large	69	7	pH 8.10	7.16	1	3.1	1	2.87591	3	0.521982	3
Emersion	03:45:00	Small	44.1	7	pH 8.10	7.4	1	2.9	1	2.77477	3	0.28717	3
Emersion	03:45:00	Small	41.2	7	pH 8.10	7.5	1	2.4	1	2.31694	3	0.19047	3
Emersion	03:45:00	Small	47	7	pH 8.10	7.55	1	2.5	1	2.42109	3	0.172467	3
Emersion	03:45:00	Large	60.1	7	pH 7.70	7.46	1	3.1	1	2.97973	3	0.258634	3
Emersion	03:45:00	Large	73.9	7	pH 7.70	7.54	1	2.7	1	2.61184	3	0.187096	3
Emersion	03:45:00	Large	63.2	7	pH 7.70	7.45	1	2.2	1	2.11229	3	0.186154	3
Emersion	03:45:00	Small	44.7	7	pH 7.70	7.58	1	2.5	1	2.42534	3	0.15845	3
Emersion	03:45:00	Small	43	7	pH 7.70	7.52	1	3	1	2.89759	3	0.217348	3
Emersion	03:45:00	Small	47.6	7	pH 7.70	7.6	1	2.6	1	2.52575	3	0.157583	3
Emersion	04:30:00	Large	65.8	7	pH 8.10	7.4	1	2.5	1	2.39496	3	0.257818	3
Emersion	04:30:00	Large	60.1	7	pH 8.10	7.37	1	2.2	1	2.09915	3	0.234922	3
Emersion	04:30:00	Large	66.7	7	pH 8.10	7.6	1	2.7	1	2.62534	3	0.171749	3
Emersion	04:30:00	Small	44.2	7	pH 8.10	7.6	1	2.9	1	2.8195	3	0.183435	3
Emersion	04:30:00	Small	43.9	7	pH 8.10	7.5	1	2.6	1	2.50979	3	0.205565	3
Emersion	04:30:00	Small	43.9	7	pH 8.10	7.57	1	2	1	1.94017	3	0.133751	3
Emersion	04:30:00	Large	64.2	7	pH 7.70	7.28	1	2.7	1	2.54629	3	0.340337	3
Emersion	04:30:00	Large	61.8	7	pH 7.70	7.28	1	2.7	1	2.5459	3	0.338996	3
Emersion	04:30:00	Large	70.3	7	pH 7.70	7.3	1	2.7	1	2.55228	3	0.323931	3
Emersion	04:30:00	Small	42.8	7	pH 7.70	7.37	1	2.7	1	2.57259	3	0.275779	3
Emersion	04:30:00	Small	43	7	pH 7.70	7.28	1	2.7	1	2.54494	3	0.335635	3
Emersion	04:30:00	Small	44.9	7	pH 7.70	7.47	1	2.4	1	2.30916	3	0.196627	3
Emersion	05:15:00	Large	63.8	7	pH 8.10	7.2	1	2.2	1	2.05615	3	0.347744	3
Emersion	05:15:00	Large	61.7	7	pH 8.10	7.26	1	2	1	1.88328	3	0.271023	3
Emersion	05:15:00	Large	65.5	7	pH 8.10	7.09	1	2.5	1	2.2883	3	0.480862	3
Emersion	05:15:00	Small	43.4	7	pH 8.10	7.4	1	2.8	1	2.6777	3	0.272523	3
Emersion	05:15:00	Small	44.8	7	pH 8.10	7.47	1	2	1	1.92459	3	0.164828	3
Emersion	05:15:00	Small	45.1	7	pH 8.10	7.4	1	2.6	1	2.48455	3	0.246642	3
Emersion	05:15:00	Large	67.9	7	pH 7.70	7.17	1	2.4	1	2.22337	3	0.37116	3
Emersion	05:15:00	Large	68.8	7	pH 7.70	7.21	1	3.6	1	3.35558	3	0.506823	3
Emersion	05:15:00	Large	67.3	7	pH 7.70	7.3	1	2.3	1	2.17094	3	0.264921	3
Emersion	05:15:00	Small	43.3	7	pH 7.70	7.35	1	2.6	1	2.46918	3	0.268547	3
Emersion	05:15:00	Small	46.1	7	pH 7.70	7.36	1	3.7	1	3.51716	3	0.371548	3
Emersion	05:15:00	Small	42.1	7	pH 7.70	7.42	1	3.9	1	3.73085	3	0.342566	3
Emersion	06:00:00	Large	64.8	7	pH 8.10	7.12	1	2.8	1	2.578	3	0.507454	3
Emersion	06:00:00	Large	69.7	7	pH 8.10	7.09	1	2.4	1	2.19529	3	0.456176	3
Emersion	06:00:00	Large	64.8	7	pH 8.10	7.21	1	2.2	1	2.05285	3	0.317474	3
Emersion	06:00:00	Small	43.1	7	pH 8.10	7.31	1	2.2	1	2.08118	3	0.254669	3
Emersion	06:00:00	Small	41.9	7	pH 8.10	7.3	1	2.2	1	2.0778	3	0.257639	3
Emersion	06:00:00	Small	43.8	7	pH 8.10	7.29	1	2	1	1.88604	3	0.237889	3
Emersion	06:00:00	Large	62.1	7	pH 7.70	7.3	1	2.6	1	2.45503	3	0.302609	3
Emersion	06:00:00	Large	71.4	7	pH 7.70	7.11	1	2.2	1	2.01498	3	0.382374	3
Emersion	06:00:00	Large	69.2	7	pH 7.70	7.14	1	3	1	2.76321	3	0.489363	3
Emersion	06:00:00	Small	40	7	pH 7.70	7.42	1	2.3	1	2.20101	3	0.204569	3
Emersion	06:00:00	Small	42.3	7	pH 7.70	7.41	1	2.1	1	2.00761	3	0.19094	3
Emersion	06:00:00	Small	41.8	7	pH 7.70	7.31	1	2.9	1	2.74118	3	0.328213	3
Emersion	00:00:00	Large	73.1	14	pH 8.10	7.51	1	2.3	1	2.22614	3	0.192488	3
Emersion	00:00:00	Large	65.2	14	pH 8.10	7.5	1	1.9	1	1.83761	3	0.162594	3
Emersion	00:00:00	Large	60.9	14	pH 8.10	7.56	1	2	1	1.94256	3	0.149701	3
Emersion	00:00:00	Small	45.6	14	pH 8.10	7.55	1	1.8	1	1.74713	3	0.137777	3
Emersion	00:00:00	Small	41.3	14	pH 8.10	7.56	1	1.7	1	1.65117	3	0.127246	3
Emersion	00:00:00	Small	41.2	14	pH 8.10	7.56	1	1.5	1	1.45692	3	0.112276	3
Emersion	00:00:00	Large	74.1	14	pH 7.70	7.31	1	2.7	1	2.56511	3	0.351526	3
Emersion	00:00:00	Large	62.9	14	pH 7.70	7.46	1	2.2	1	2.12104	3	0.205778	3
Emersion	00:00:00	Large	64.7	14	pH 7.70	7.42	1	2.3	1	2.2098	3	0.235074	3
Emersion	00:00:00	Small	41.8	14	pH 7.70	7.56	1	2.2	1	2.13681	3	0.164671	3
Emersion	00:00:00	Small	40.6	14	pH 7.70	7.46	1	2.3	1	2.21745	3	0.215132	3
Emersion	00:00:00	Small	40.5	14	pH 7.70	7.49	1	2.1	1	2.02949	3	0.183755	3
Emersion	00:45:00	Large	62.4	14	pH 8.10	7.35	1	2.1	1	2.00342	3	0.248716	3
Emersion	00:45:00	Large	67.1	14	pH 8.10	7.38	1	2.3	1	2.20098	3	0.255004	3
Emersion	00:45:00	Large	69	14	pH 8.10	7.33	1	2.1	1	1.99909	3	0.259875	3
Emersion	00:45:00	Small	46.3	14	pH 8.10	7.66	1	1.9	1	1.85618	3	0.112863	3
Emersion	00:45:00	Small	40.1	14	pH 8.10	7.62	1	2.1	1	2.04701	3	0.136474	3
Emersion	00:45:00	Small	48.8	14	pH 8.10	7.58	1	2.3	1	2.23652	3	0.163494	3
Emersion	00:45:00	Large	70.5	14	pH 7.70	7.23	1	2.8	1	2.6327	3	0.430856	3
Emersion	00:45:00	Large	73.2	14	pH 7.70	7.24	1	2.8	1	2.63628	3	0.421622	3
Emersion	00:45:00	Large	69.1	14	pH 7.70	7.4	1	2.7	1	2.58878	3	0.286435	3
Emersion	00:45:00	Small	42.8	14	pH 7.70	7.37	1	2.7	1	2.58117	3	0.306019	3
Emersion	00:45:00	Small	43.9	14	pH 7.70	7.35	1	2.8	1	2.67123	3	0.331621	3
Emersion	00:45:00	Small	45.7	14	pH 7.70	7.47	1	2.1	1	2.02592	3	0.190789	3
Emersion	01:30:00	Large	63.3	14	pH 8.10	7.41	1	2.2	1	2.11103	3	0.227101	3
Emersion	01:30:00	Large	71.1	14	pH 8.10	7.32	1	2	1	1.90141	3	0.251653	3
Emersion	01:30:00	Large	64.9	14	pH 8.10	7.45	1	2	1	1.92597	3	0.188962	3
Emersion	01:30:00	Small	43.9	14	pH 8.10	7.36	1	2.2	1	2.10066	3	0.253561	3
Emersion	01:30:00	Small	40	14	pH 8.10	7.4	1	1.9	1	1.82144	3	0.200513	3
Emersion	01:30:00	Small	46.1	14	pH 8.10	7.35	1	2.1	1	2.00307	3	0.247413	3
Emersion	01:30:00	Large	77.4	14	pH 7.70	7.42	1	2.7	1	2.59319	3	0.272622	3
Emersion	01:30:00	Large	61.4	14	pH 7.70	7.44	1	2.8	1	2.69403	3	0.270476	3
Emersion	01:30:00	Large	60	14	pH 7.70	7.48	1	2.5	1	2.41342	3	0.220983	3
Emersion	01:30:00	Small	45.7	14	pH 7.70	7.44	1	2.4	1	2.30917	3	0.231837	3
Emersion	01:30:00	Small	46.1	14	pH 7.70	7.43	1	2.9	1	2.78779	3	0.286409	3
Emersion	01:30:00	Small	42.2	14	pH 7.70	7.36	1	2.7	1	2.57808	3	0.311188	3
Emersion	02:15:00	Large	70.3	14	pH 8.10	7.37	1	2.2	1	2.10258	3	0.247173	3
Emersion	02:15:00	Large	73.1	14	pH 8.10	7.34	1	1.9	1	1.81013	3	0.228013	3
Emersion	02:15:00	Large	64.6	14	pH 8.10	7.42	1	2	1	1.92069	3	0.201236	3
Emersion	02:15:00	Small	44	14	pH 8.10	7.26	1	1.8	1	1.69861	3	0.257243	3
Emersion	02:15:00	Small	46.1	14	pH 8.10	7.22	1	2.1	1	1.97101	3	0.327293	3
Emersion	02:15:00	Small	42.1	14	pH 8.10	7.18	1	2.2	1	2.0527	3	0.373744	3
Emersion	02:15:00	Large	62.9	14	pH 7.70	7.15	1	2.8	1	2.60008	3	0.507265	3
Emersion	02:15:00	Large	68.9	14	pH 7.70	7	1	3	1	2.70608	3	0.745744	3
Emersion	02:15:00	Large	71.2	14	pH 7.70	7.16	1	2.8	1	2.60431	3	0.496525	3
Emersion	02:15:00	Small	42.3	14	pH 7.70	7.45	1	2.8	1	2.6961	3	0.263624	3
Emersion	02:15:00	Small	43.2	14	pH 7.70	7.37	1	2.8	1	2.67601	3	0.314584	3
Emersion	02:15:00	Small	43.3	14	pH 7.70	7.5	1	2.6	1	2.51366	3	0.219056	3
Emersion	03:00:00	Large	64.8	14	pH 8.10	7.29	1	2.5	1	2.36825	3	0.335286	3
Emersion	03:00:00	Large	64.2	14	pH 8.10	7.15	1	2.1	1	1.95024	3	0.381132	3
Emersion	03:00:00	Large	67.3	14	pH 8.10	7.25	1	2.1	1	1.97927	3	0.30725	3
Emersion	03:00:00	Small	44.2	14	pH 8.10	7.37	1	1.8	1	1.72039	3	0.202589	3
Emersion	03:00:00	Small	41.1	14	pH 8.10	7.38	1	1.9	1	1.8178	3	0.209187	3
Emersion	03:00:00	Small	45.1	14	pH 8.10	7.58	1	1.8	1	1.75007	3	0.12707	3
Emersion	03:00:00	Large	72.3	14	pH 7.70	7.33	1	2.9	1	2.75997	3	0.356363	3
Emersion	03:00:00	Large	78.7	14	pH 7.70	7.23	1	3	1	2.81988	3	0.458373	3
Emersion	03:00:00	Large	70.1	14	pH 7.70	7.32	1	2.9	1	2.75687	3	0.364254	3
Emersion	03:00:00	Small	47	14	pH 7.70	7.32	1	3.1	1	2.947	3	0.389375	3
Emersion	03:00:00	Small	44.9	14	pH 7.70	7.4	1	2.9	1	2.77995	3	0.30551	3
Emersion	03:00:00	Small	42	14	pH 7.70	7.53	1	2.7	1	2.61625	3	0.213141	3
Emersion	03:45:00	Large	65.1	14	pH 8.10	7.1	1	2.7	1	2.48531	3	0.54311	3
Emersion	03:45:00	Large	69.9	14	pH 8.10	6.94	1	3.2	1	2.84479	3	0.898582	3
Emersion	03:45:00	Large	70.2	14	pH 8.10	6.97	1	3.1	1	2.77646	3	0.818463	3
Emersion	03:45:00	Small	43.4	14	pH 8.10	7.24	1	2.2	1	2.07043	3	0.32777	3
Emersion	03:45:00	Small	45.2	14	pH 8.10	7.35	1	2.2	1	2.09808	3	0.257828	3
Emersion	03:45:00	Small	45.3	14	pH 8.10	7.38	1	2.1	1	2.00892	3	0.230394	3
Emersion	03:45:00	Large	77.1	14	pH 7.70	7.02	1	2.8	1	2.53656	3	0.666427	3
Emersion	03:45:00	Large	65.8	14	pH 7.70	7.06	1	3.2	1	2.92312	3	0.700414	3
Emersion	03:45:00	Large	67.3	14	pH 7.70	7.12	1	3	1	2.77137	3	0.578365	3
Emersion	03:45:00	Small	43.4	14	pH 7.70	7.38	1	2.3	1	2.20025	3	0.252336	3
Emersion	03:45:00	Small	45.2	14	pH 7.70	7.42	1	2.2	1	2.11265	3	0.220971	3
Emersion	03:45:00	Small	45.3	14	pH 7.70	7.41	1	3	1	2.87822	3	0.308058	3
Emersion	04:30:00	Large	67.1	14	pH 8.10	7.18	1	2.1	1	1.95923	3	0.356117	3
Emersion	04:30:00	Large	65.1	14	pH 8.10	7.04	1	2.8	1	2.54735	3	0.639139	3
Emersion	04:30:00	Large	73.2	14	pH 8.10	7	1	2.7	1	2.43517	3	0.669942	3
Emersion	04:30:00	Small	42.3	14	pH 8.10	7.47	1	1.9	1	1.83247	3	0.170823	3
Emersion	04:30:00	Small	43.1	14	pH 8.10	7.33	1	2.8	1	2.66447	3	0.342861	3
Emersion	04:30:00	Small	44.3	14	pH 8.10	7.3	1	2	1	1.89662	3	0.26151	3
Emersion	04:30:00	Large	73.4	14	pH 7.70	7.32	1	2.7	1	2.56641	3	0.337936	3
Emersion	04:30:00	Large	73.9	14	pH 7.70	6.92	1	2.8	1	2.47623	3	0.819029	3
Emersion	04:30:00	Large	67.3	14	pH 7.70	7.04	1	3.5	1	3.18418	3	0.798924	3
Emersion	04:30:00	Small	43.8	14	pH 7.70	7.16	1	3.3	1	3.06909	3	0.58414	3
Emersion	04:30:00	Small	45.6	14	pH 7.70	7.4	1	2.6	1	2.4921	3	0.272944	3
Emersion	04:30:00	Small	46.2	14	pH 7.70	7.45	1	2.7	1	2.59969	3	0.253763	3
Emersion	04:30:00	Small	40.3	14	pH 7.70	7.27	1	2.4	1	2.26757	3	0.335018	3
Emersion	05:15:00	Large	64.4	14	pH 8.10	7.15	1	2.1	1	1.95006	3	0.380448	3
Emersion	05:15:00	Large	73	14	pH 8.10	7.14	1	2.3	1	2.13223	3	0.425679	3
Emersion	05:15:00	Large	78.1	14	pH 8.10	7.08	1	1.8	1	1.65086	3	0.378407	3
Emersion	05:15:00	Small	46.1	14	pH 8.10	7.32	1	2.2	1	2.09128	3	0.275843	3
Emersion	05:15:00	Small	43	14	pH 8.10	7.46	1	2.2	1	2.12015	3	0.202589	3
Emersion	05:15:00	Small	43.2	14	pH 8.10	7.24	1	2.2	1	2.07059	3	0.328354	3
Emersion	05:15:00	Small	44.5	14	pH 8.10	7.47	1	1.7	1	1.63966	3	0.153109	3
Emersion	05:15:00	Large	76	14	pH 7.70	7.03	1	2.8	1	2.5423	3	0.653847	3
Emersion	05:15:00	Large	73.3	14	pH 7.70	7.05	1	3.4	1	3.09992	3	0.761377	3
Emersion	05:15:00	Large	73.8	14	pH 7.70	7.09	1	2.8	1	2.57286	3	0.576321	3
Emersion	05:15:00	Small	45.9	14	pH 7.70	7.41	1	2.6	1	2.49459	3	0.267453	3
Emersion	05:15:00	Small	44	14	pH 7.70	7.36	1	3	1	2.8642	3	0.34455	3
Emersion	05:15:00	Small	44.7	14	pH 7.70	7.58	1	2.8	1	2.72223	3	0.197321	3
Emersion	06:00:00	Large	69.9	14	pH 8.10	6.89	1	3	1	2.63093	3	0.93084	3
Emersion	06:00:00	Large	70	14	pH 8.10	7.04	1	2.3	1	2.09222	3	0.52405	3
Emersion	06:00:00	Large	66.8	14	pH 8.10	7.05	1	2.3	1	2.09653	3	0.513176	3
Emersion	06:00:00	Large	71.5	14	pH 8.10	7.29	1	2	1	1.89421	3	0.266805	3
Emersion	06:00:00	Small	42.2	14	pH 8.10	7.16	1	2.1	1	1.95288	3	0.371057	3
Emersion	06:00:00	Small	44.4	14	pH 8.10	7.29	1	2.7	1	2.55719	3	0.360187	3
Emersion	06:00:00	Small	42.3	14	pH 8.10	7.38	1	2.1	1	2.00881	3	0.229988	3
Emersion	06:00:00	Large	66.1	14	pH 7.70	7.16	1	3.6	1	3.34779	3	0.636098	3
Emersion	06:00:00	Large	62.2	14	pH 7.70	7.08	1	2.6	1	2.38407	3	0.544608	3
Emersion	06:00:00	Large	73	14	pH 7.70	7.06	1	2.8	1	2.55745	3	0.611748	3
Emersion	06:00:00	Small	37.4	14	pH 7.70	7.45	1	3.1	1	2.98468	3	0.290846	3
Emersion	06:00:00	Small	45.8	14	pH 7.70	7.5	1	2.7	1	2.61012	3	0.226687	3
Emersion	06:00:00	Small	43.9	14	pH 7.70	7.51	1	2.7	1	2.6121	3	0.221695	3
Emersion	06:00:00	Small	44.6	14	pH 7.70	7.46	1	2.9	1	2.79449	3	0.266114	3
Emersion	00:00:00	Large	68.2	20	pH 8.10	7.46	1	1.5	1	1.44932	3	0.15241	3
Emersion	00:00:00	Large	65.3	20	pH 8.10	7.47	1	1.8	1	1.74053	3	0.178866	3
Emersion	00:00:00	Large	66.2	20	pH 8.10	7.51	1	2	1	1.93956	3	0.181781	3
Emersion	00:00:00	Small	44.9	20	pH 8.10	7.52	1	1.6	1	1.55271	3	0.142213	3
Emersion	00:00:00	Small	45.2	20	pH 8.10	7.48	1	2	1	1.93537	3	0.194362	3
Emersion	00:00:00	Small	45.1	20	pH 8.10	7.4	1	1.1	1	1.05754	3	0.127687	3
Emersion	00:00:00	Large	65	20	pH 7.70	7.36	1	1.9	1	1.81989	3	0.240931	3
Emersion	00:00:00	Large	62.4	20	pH 7.70	7.31	1	2.1	1	2.00116	3	0.297255	3
Emersion	00:00:00	Large	69.8	20	pH 7.70	7.43	1	2.8	1	2.69888	3	0.30411	3
Emersion	00:00:00	Small	47.8	20	pH 7.70	7.53	1	1.9	1	1.84509	3	0.165145	3
Emersion	00:00:00	Small	43.2	20	pH 7.70	7.49	1	2	1	1.9368	3	0.190078	3
Emersion	00:00:00	Small	39.9	20	pH 7.70	7.57	1	2.2	1	2.14186	3	0.174839	3
Emersion	00:45:00	Large	71.6	20	pH 8.10	7.31	1	2.4	1	2.28704	3	0.33972	3
Emersion	00:45:00	Large	62.9	20	pH 8.10	7.35	1	2.3	1	2.20086	3	0.298153	3
Emersion	00:45:00	Large	61.8	20	pH 8.10	7.28	1	2.1	1	1.99445	3	0.317446	3
Emersion	00:45:00	Small	42.1	20	pH 8.10	7.51	1	3.2	1	3.10329	3	0.29085	3
Emersion	00:45:00	Small	43.2	20	pH 8.10	7.45	1	2.2	1	2.124	3	0.228561	3
Emersion	00:45:00	Small	43.2	20	pH 8.10	7.59	1	2.1	1	2.04694	3	0.15957	3
Emersion	00:45:00	Large	74.6	20	pH 7.70	7.53	1	2.5	1	2.42775	3	0.217295	3
Emersion	00:45:00	Large	68.2	20	pH 7.70	7.46	1	2.4	1	2.31892	3	0.243855	3
Emersion	00:45:00	Large	76.1	20	pH 7.70	7.49	1	2.3	1	2.22732	3	0.218589	3
Emersion	00:45:00	Small	50.1	20	pH 7.70	7.5	1	2	1	1.93819	3	0.185885	3
Emersion	00:45:00	Small	44	20	pH 7.70	7.47	1	2.4	1	2.3207	3	0.238488	3
Emersion	00:45:00	Small	42	20	pH 7.70	7.56	1	1.9	1	1.84865	3	0.15442	3
Emersion	01:30:00	Large	62.5	20	pH 8.10	7.33	1	2.6	1	2.48289	3	0.352212	3
Emersion	01:30:00	Large	69.4	20	pH 8.10	7.38	1	2.7	1	2.59107	3	0.327587	3
Emersion	01:30:00	Large	70.3	20	pH 8.10	7.35	1	2.2	1	2.10517	3	0.28519	3
Emersion	01:30:00	Small	47.1	20	pH 8.10	7.5	1	2.3	1	2.22892	3	0.213768	3
Emersion	01:30:00	Small	43.3	20	pH 8.10	7.31	1	1.7	1	1.61999	3	0.240635	3
Emersion	01:30:00	Small	47	20	pH 8.10	7.42	1	1.3	1	1.252	3	0.144361	3
Emersion	01:30:00	Large	74	20	pH 7.70	7.39	1	2.2	1	2.11319	3	0.261087	3
Emersion	01:30:00	Large	66.1	20	pH 7.70	7.22	1	2.2	1	2.07397	3	0.37901	3
Emersion	01:30:00	Large	60.6	20	pH 7.70	7.36	1	2.1	1	2.01146	3	0.266292	3
Emersion	01:30:00	Small	45.9	20	pH 7.70	7.29	1	2.1	1	1.99673	3	0.310575	3
Emersion	01:30:00	Small	45	20	pH 7.70	7.2	1	2.4	1	2.25643	3	0.431786	3
Emersion	01:30:00	Small	48.6	20	pH 7.70	7.3	1	2.2	1	2.09416	3	0.318315	3
Emersion	02:15:00	Large	67.6	20	pH 8.10	7.02	1	2.5	1	2.28039	3	0.660474	3
Emersion	02:15:00	Large	73.4	20	pH 8.10	7.26	1	2.7	1	2.55823	3	0.42637	3
Emersion	02:15:00	Large	76.5	20	pH 8.10	7.25	1	2.5	1	2.36584	3	0.403489	3
Emersion	02:15:00	Small	37.4	20	pH 8.10	7.4	1	2.3	1	2.21123	3	0.266981	3
Emersion	02:15:00	Small	48.8	20	pH 8.10	7.48	1	2.4	1	2.32245	3	0.233235	3
Emersion	02:15:00	Small	46.4	20	pH 8.10	7.43	1	2.4	1	2.31333	3	0.260666	3
Emersion	02:15:00	Large	69.3	20	pH 7.70	7.16	1	2.4	1	2.24348	3	0.470727	3
Emersion	02:15:00	Large	67	20	pH 7.70	7.38	1	2.8	1	2.68704	3	0.33972	3
Emersion	02:15:00	Large	68.1	20	pH 7.70	7.25	1	2.7	1	2.5551	3	0.435768	3
Emersion	02:15:00	Small	46.2	20	pH 7.70	7.43	1	2.1	1	2.02416	3	0.228083	3
Emersion	02:15:00	Small	43	20	pH 7.70	7.45	1	2.6	1	2.51018	3	0.270117	3
Emersion	02:15:00	Small	37.1	20	pH 7.70	7.48	1	2.9	1	2.80629	3	0.281825	3
Emersion	03:00:00	Large	71.3	20	pH 8.10	7.21	1	2	1	1.88359	3	0.354986	3
Emersion	03:00:00	Large	69.1	20	pH 8.10	7.09	1	2.8	1	2.58907	3	0.643232	3
Emersion	03:00:00	Large	72.4	20	pH 8.10	7.24	1	2.5	1	2.36368	3	0.41573	3
Emersion	03:00:00	Small	42.3	20	pH 8.10	7.39	1	2.2	1	2.1137	3	0.263188	3
Emersion	03:00:00	Small	40.8	20	pH 8.10	7.43	1	1.9	1	1.83179	3	0.208017	3
Emersion	03:00:00	Small	46.5	20	pH 8.10	7.3	1	2.3	1	2.18999	3	0.335479	3
Emersion	03:00:00	Large	75.2	20	pH 7.70	7.13	1	3	1	2.79252	3	0.632731	3
Emersion	03:00:00	Large	67	20	pH 7.70	7.26	1	2.3	1	2.17993	3	0.366156	3
Emersion	03:00:00	Large	72.2	20	pH 7.70	7.07	1	2.8	1	2.57992	3	0.671164	3
Emersion	03:00:00	Small	44.9	20	pH 7.70	7.61	1	2.8	1	2.73277	3	0.205034	3
Emersion	03:00:00	Small	45	20	pH 7.70	7.59	1	3.1	1	3.02214	3	0.237431	3
Emersion	03:00:00	Small	43.2	20	pH 7.70	7.46	1	2.2	1	2.12611	3	0.225325	3
Emersion	03:45:00	Large	69.3	20	pH 8.10	7.06	1	2.6	1	2.39079	3	0.634477	3
Emersion	03:45:00	Large	77	20	pH 8.10	7.09	1	2.5	1	2.31125	3	0.572429	3
Emersion	03:45:00	Large	62.9	20	pH 8.10	7.13	1	2.4	1	2.23363	3	0.50453	3
Emersion	03:45:00	Small	43.2	20	pH 8.10	7.35	1	2.3	1	2.20121	3	0.299596	3
Emersion	03:45:00	Small	39.7	20	pH 8.10	7.42	1	2.9	1	2.7933	3	0.323588	3
Emersion	03:45:00	Small	46.1	20	pH 8.10	7.45	1	2.7	1	2.60706	3	0.281855	3
Emersion	03:45:00	Large	60.2	20	pH 7.70	7.23	1	2.7	1	2.54918	3	0.457379	3
Emersion	03:45:00	Large	71.1	20	pH 7.70	7.11	1	2.1	1	1.94807	3	0.460764	3
Emersion	03:45:00	Large	66.3	20	pH 7.70	7.16	1	1.7	1	1.58951	3	0.335073	3
Emersion	03:45:00	Small	49.7	20	pH 7.70	7.28	1	2.6	1	2.46977	3	0.394941	3
Emersion	03:45:00	Small	42	20	pH 7.70	7.4	1	2.8	1	2.69231	3	0.326588	3
Emersion	03:45:00	Small	43.5	20	pH 7.70	7.41	1	3.4	1	3.2721	3	0.387884	3
Emersion	04:30:00	Large	66.4	20	pH 8.10	6.97	1	2.7	1	2.43728	3	0.794522	3
Emersion	04:30:00	Large	65	20	pH 8.10	7.1	1	2	1	1.85201	3	0.447552	3
Emersion	04:30:00	Large	68.5	20	pH 8.10	6.82	1	3.1	1	2.69037	3	1.23883	3
Emersion	04:30:00	Small	42	20	pH 8.10	7.15	1	2.5	1	2.33379	3	0.502646	3
Emersion	04:30:00	Small	43.7	20	pH 8.10	7.22	1	2.3	1	2.16855	3	0.39753	3
Emersion	04:30:00	Small	42.6	20	pH 8.10	7.3	1	2	1	1.904	3	0.290314	3
Emersion	04:30:00	Large	65.9	20	pH 7.70	7.14	1	2.3	1	2.14377	3	0.472474	3
Emersion	04:30:00	Large	68.5	20	pH 7.70	7.12	1	2.6	1	2.41566	3	0.557488	3
Emersion	04:30:00	Large	60	20	pH 7.70	7.3	1	2.8	1	2.66561	3	0.406439	3
Emersion	04:30:00	Small	44.8	20	pH 7.70	7.33	1	2.6	1	2.48316	3	0.35335	3
Emersion	04:30:00	Small	43.1	20	pH 7.70	7.37	1	2.3	1	2.20536	3	0.286207	3
Emersion	04:30:00	Small	47.2	20	pH 7.70	7.42	1	2.8	1	2.69686	3	0.31193	3
Emersion	05:15:00	Large	61.7	20	pH 8.10	6.94	1	2.2	1	1.97271	3	0.691214	3
Emersion	05:15:00	Large	62	20	pH 8.10	7.11	1	2.5	1	2.31933	3	0.54943	3
Emersion	05:15:00	Large	64.8	20	pH 8.10	7.23	1	1.2	1	1.13305	3	0.203609	3
Emersion	05:15:00	Small	40.2	20	pH 8.10	7.4	1	2.1	1	2.01933	3	0.245333	3
Emersion	05:15:00	Small	42.1	20	pH 8.10	7.55	1	1.9	1	1.84774	3	0.158924	3
Emersion	05:15:00	Small	47.1	20	pH 8.10	7.58	1	1.7	1	1.65628	3	0.132949	3
Emersion	05:15:00	Large	75.8	20	pH 7.70	7.07	1	2.8	1	2.57967	3	0.670059	3
Emersion	05:15:00	Large	67.1	20	pH 7.70	6.97	1	2.9	1	2.61845	3	0.856236	3
Emersion	05:15:00	Large	60.3	20	pH 7.70	7	1	2.7	1	2.45376	3	0.748829	3
Emersion	05:15:00	Small	46	20	pH 7.70	7.22	1	2.7	1	2.54605	3	0.468184	3
Emersion	05:15:00	Small	46.2	20	pH 7.70	7.55	1	2.4	1	2.33399	3	0.200747	3
Emersion	05:15:00	Small	47	20	pH 7.70	7.51	1	2.7	1	2.61879	3	0.246973	3
Emersion	06:00:00	Large	65.7	20	pH 8.10	7.12	1	2.2	1	2.0442	3	0.472496	3
Emersion	06:00:00	Large	76.4	20	pH 8.10	7.08	1	3.5	1	3.23006	3	0.818627	3
Emersion	06:00:00	Large	69.2	20	pH 8.10	7.08	1	2.4	1	2.2149	3	0.561344	3
Emersion	06:00:00	Small	44.4	20	pH 8.10	7.4	1	1.8	1	1.73077	3	0.209949	3
Emersion	06:00:00	Small	43.2	20	pH 8.10	7.37	1	2.1	1	2.01369	3	0.261739	3
Emersion	06:00:00	Small	42	20	pH 8.10	7.38	1	3.1	1	2.97538	3	0.377935	3
Emersion	06:00:00	Large	67.9	20	pH 7.70	7.09	1	2.3	1	2.12635	3	0.526634	3
Emersion	06:00:00	Large	64.9	20	pH 7.70	6.96	1	2.7	1	2.43207	3	0.812551	3
Emersion	06:00:00	Large	69	20	pH 7.70	6.96	1	2.5	1	2.25191	3	0.752362	3
Emersion	06:00:00	Small	43.6	20	pH 7.70	7.26	1	3.8	1	3.60116	3	0.603001	3
Emersion	06:00:00	Small	42	20	pH 7.70	7.24	1	3.7	1	3.49777	3	0.613291	3
Emersion	06:00:00	Small	41.1	20	pH 7.70	7.3	1	2.4	1	2.28494	3	0.348939	3
Emersion	00:00:00	Large	75.8	28	pH 8.10	7.35	1	2.7	1	2.59274	3	0.390374	3
Emersion	00:00:00	Large	68.4	28	pH 8.10	7.48	1	2.5	1	2.42561	3	0.270734	3
Emersion	00:00:00	Large	66.7	28	pH 8.10	7.37	1	2.7	1	2.59739	3	0.373472	3
Emersion	00:00:00	Small	46.8	28	pH 8.10	7.44	1	2.3	1	2.22518	3	0.272324	3
Emersion	00:00:00	Small	43.9	28	pH 8.10	7.53	1	2.4	1	2.33615	3	0.232393	3
Emersion	00:00:00	Small	46.4	28	pH 8.10	7.47	1	2.4	1	2.32698	3	0.265775	3
Emersion	00:00:00	Large	66.9	28	pH 7.70	7.47	1	2.4	1	2.32698	3	0.265775	3
Emersion	00:00:00	Large	75.5	28	pH 7.70	7.5	1	2.3	1	2.23456	3	0.238184	3
Emersion	00:00:00	Large	73.7	28	pH 7.70	7.54	1	2.2	1	2.14277	3	0.208304	3
Emersion	00:00:00	Small	44.2	28	pH 7.70	7.42	1	1.8	1	1.73878	3	0.222826	3
Emersion	00:00:00	Small	39.1	28	pH 7.70	7.5	1	2.2	1	2.1374	3	0.227829	3
Emersion	00:00:00	Small	42.8	28	pH 7.70	7.47	1	1.9	1	1.84219	3	0.210405	3
Emersion	00:45:00	Large	64.2	28	pH 8.10	7.2	1	2.5	1	2.36258	3	0.505251	3
Emersion	00:45:00	Large	74.1	28	pH 8.10	7.45	1	2.7	1	2.61449	3	0.314417	3
Emersion	00:45:00	Large	76	28	pH 8.10	7.55	1	2.5	1	2.43669	3	0.232766	3
Emersion	00:45:00	Small	44.9	28	pH 8.10	7.35	1	1.9	1	1.82486	3	0.27628	3
Emersion	00:45:00	Small	42.3	28	pH 8.10	7.52	1	2.3	1	2.23771	3	0.229046	3
Emersion	00:45:00	Small	42.7	28	pH 8.10	7.5	1	2	1	1.94335	3	0.208291	3
Emersion	00:45:00	Large	73.6	28	pH 7.70	7.18	1	2.9	1	2.73352	3	0.612126	3
Emersion	00:45:00	Large	64.7	28	pH 7.70	7.35	1	2.9	1	2.78531	3	0.42169	3
Emersion	00:45:00	Large	76.8	28	pH 7.70	7.35	1	2.5	1	2.40113	3	0.363526	3
Emersion	00:45:00	Small	37.9	28	pH 7.70	7.36	1	2	1	1.92263	3	0.284457	3
Emersion	00:45:00	Small	43.1	28	pH 7.70	7.39	1	2.4	1	2.31313	3	0.319389	3
Emersion	00:45:00	Small	43.6	28	pH 7.70	7.34	1	2.4	1	2.30296	3	0.356785	3
Emersion	01:30:00	Large	65.8	28	pH 8.10	7.22	1	2.5	1	2.36873	3	0.48509	3
Emersion	01:30:00	Large	68.1	28	pH 8.10	7.01	1	2.7	1	2.47735	3	0.822798	3
Emersion	01:30:00	Large	68.9	28	pH 8.10	7.12	1	2.7	1	2.52392	3	0.650701	3
Emersion	01:30:00	Small	47	28	pH 8.10	7.53	1	3.2	1	3.11544	3	0.312483	3
Emersion	01:30:00	Small	46.2	28	pH 8.10	7.44	1	3	1	2.90306	3	0.358231	3
Emersion	01:30:00	Small	45.6	28	pH 8.10	7.56	1	2.5	1	2.43824	3	0.228235	3
Emersion	01:30:00	Large	71.5	28	pH 7.70	7.2	1	2.7	1	2.55192	3	0.547234	3
Emersion	01:30:00	Large	64.6	28	pH 7.70	7.04	1	2.8	1	2.58332	3	0.800727	3
Emersion	01:30:00	Large	73.7	28	pH 7.70	7.19	1	2.9	1	2.73745	3	0.600693	3
Emersion	01:30:00	Small	45.7	28	pH 7.70	7.32	1	2.7	1	2.58616	3	0.42069	3
Emersion	01:30:00	Small	47	28	pH 7.70	7.38	1	2.2	1	2.11877	3	0.300186	3
Emersion	01:30:00	Small	46.8	28	pH 7.70	7.38	1	2.8	1	2.69661	3	0.382054	3
Emersion	02:15:00	Large	76.1	28	pH 8.10	6.83	1	3.4	1	2.99288	3	1.50451	3
Emersion	02:15:00	Large	69.5	28	pH 8.10	7.24	1	2.8	1	2.65927	3	0.520078	3
Emersion	02:15:00	Large	69.7	28	pH 8.10	7.16	1	2.2	1	2.06839	3	0.48634	3
Emersion	02:15:00	Small	46.3	28	pH 8.10	7.61	1	3.1	1	3.03156	3	0.252914	3
Emersion	02:15:00	Small	44.9	28	pH 8.10	7.63	1	2.4	1	2.34935	3	0.187178	3
Emersion	02:15:00	Small	48.3	28	pH 8.10	7.56	1	3	1	2.92589	3	0.273882	3
Emersion	02:15:00	Large	68.3	28	pH 7.70	7.38	1	2.5	1	2.40769	3	0.34112	3
Emersion	02:15:00	Large	75.6	28	pH 7.70	7.01	1	3	1	2.75261	3	0.91422	3
Emersion	02:15:00	Large	71.1	28	pH 7.70	7.19	1	2.3	1	2.17108	3	0.476412	3
Emersion	02:15:00	Small	42.8	28	pH 7.70	7.34	1	2.3	1	2.20721	3	0.342887	3
Emersion	02:15:00	Small	48	28	pH 7.70	7.21	1	2.5	1	2.36584	3	0.495783	3
Emersion	02:15:00	Small	47.3	28	pH 7.70	7.31	1	3	1	2.87069	3	0.477852	3
Emersion	03:00:00	Large	64.8	28	pH 8.10	6.96	1	2.5	1	2.27099	3	0.846295	3
Emersion	03:00:00	Large	73.7	28	pH 8.10	6.92	1	2.5	1	2.2511	3	0.919815	3
Emersion	03:00:00	Large	71.1	28	pH 8.10	6.92	1	3	1	2.70131	3	1.10378	3
Emersion	03:00:00	Small	42.3	28	pH 8.10	7.45	1	2.8	1	2.71152	3	0.326978	3
Emersion	03:00:00	Small	43.1	28	pH 8.10	7.44	1	2.2	1	2.12891	3	0.262702	3
Emersion	03:00:00	Small	45	28	pH 8.10	7.52	1	1.6	1	1.55676	3	0.159782	3
Emersion	03:00:00	Large	68.9	28	pH 7.70	7.48	1	3.9	1	3.78474	3	0.425934	3
Emersion	03:00:00	Large	67.8	28	pH 7.70	7.49	1	2.9	1	2.81619	3	0.309719	3
Emersion	03:00:00	Large	70.1	28	pH 7.70	7.46	1	3.4	1	3.29493	3	0.388287	3
Emersion	03:00:00	Small	42.6	28	pH 7.70	7.35	1	3	1	2.88162	3	0.437465	3
Emersion	03:00:00	Small	39.8	28	pH 7.70	7.42	1	3.5	1	3.38176	3	0.436967	3
Emersion	03:00:00	Small	43.9	28	pH 7.70	7.47	1	2.8	1	2.71538	3	0.312707	3
Emersion	03:45:00	Large	71.2	28	pH 8.10	6.88	1	3.1	1	2.76515	3	1.24055	3
Emersion	03:45:00	Large	72.4	28	pH 8.10	6.99	1	2.6	1	2.3766	3	0.82766	3
Emersion	03:45:00	Large	72.9	28	pH 8.10	6.84	1	2.7	1	2.38352	3	1.17251	3
Emersion	03:45:00	Small	38.7	28	pH 8.10	7.37	1	3	1	2.88687	3	0.419107	3
Emersion	03:45:00	Small	43.6	28	pH 8.10	7.46	1	3	1	2.90739	3	0.343084	3
Emersion	03:45:00	Small	41.5	28	pH 8.10	7.35	1	2.6	1	2.49752	3	0.379669	3
Emersion	03:45:00	Large	77.1	28	pH 7.70	6.87	1	3.2	1	2.84718	3	1.30711	3
Emersion	03:45:00	Large	71.2	28	pH 7.70	6.86	1	3	1	2.6624	3	1.25075	3
Emersion	03:45:00	Large	65.8	28	pH 7.70	7.12	1	2.5	1	2.33714	3	0.603366	3
Emersion	03:45:00	Small	44.9	28	pH 7.70	7.36	1	2.8	1	2.69205	3	0.399926	3
Emersion	03:45:00	Small	46.1	28	pH 7.70	7.39	1	3.3	1	3.18096	3	0.441017	3
Emersion	03:45:00	Small	43	28	pH 7.70	7.29	1	3.2	1	3.05602	3	0.533401	3
Emersion	04:30:00	Large	71.3	28	pH 8.10	7.04	1	2	1	1.84556	3	0.573605	3
Emersion	04:30:00	Large	67.8	28	pH 8.10	7	1	2.9	1	2.65627	3	0.905227	3
Emersion	04:30:00	Large	66.9	28	pH 8.10	6.94	1	2.6	1	2.3522	3	0.920362	3
Emersion	04:30:00	Small	44.2	28	pH 8.10	7.24	1	2.8	1	2.65958	3	0.521552	3
Emersion	04:30:00	Small	40.6	28	pH 8.10	7.44	1	3.1	1	3.00006	3	0.371205	3
Emersion	04:30:00	Small	41.2	28	pH 8.10	7.46	1	2.3	1	2.22908	3	0.263397	3
Emersion	04:30:00	Large	68.2	28	pH 7.70	7.18	1	2.8	1	2.63996	3	0.594405	3
Emersion	04:30:00	Large	64.5	28	pH 7.70	7.23	1	3.2	1	3.03597	3	0.609231	3
Emersion	04:30:00	Large	69.5	28	pH 7.70	7.21	1	2.7	1	2.55542	3	0.536968	3
Emersion	04:30:00	Small	45.1	28	pH 7.70	7.38	1	2.1	1	2.02263	3	0.287344	3
Emersion	04:30:00	Small	46	28	pH 7.70	7.29	1	2.7	1	2.57865	3	0.45069	3
Emersion	04:30:00	Small	42.1	28	pH 7.70	7.45	1	3.3	1	3.19595	3	0.386443	3
Emersion	05:15:00	Large	67.2	28	pH 8.10	6.69	1	2.3	1	1.9371	3	1.34784	3
Emersion	05:15:00	Large	65	28	pH 8.10	6.83	1	3.8	1	3.34591	3	1.68655	3
Emersion	05:15:00	Large	70.4	28	pH 8.10	6.71	1	3.4	1	2.88402	3	1.91639	3
Emersion	05:15:00	Small	45.2	28	pH 8.10	7.4	1	1.4	1	1.35066	3	0.183245	3
Emersion	05:15:00	Small	42.8	28	pH 8.10	7.31	1	1.6	1	1.53119	3	0.255572	3
Emersion	05:15:00	Small	44.3	28	pH 8.10	7.41	1	3	1	2.8966	3	0.384037	3
Emersion	05:15:00	Large	69.7	28	pH 7.70	7.11	1	3.4	1	3.17394	3	0.839621	3
Emersion	05:15:00	Large	65.1	28	pH 7.70	6.85	1	2.6	1	2.30168	3	1.10798	3
Emersion	05:15:00	Large	69.9	28	pH 7.70	6.72	1	2.6	1	2.21308	3	1.43708	3
Emersion	05:15:00	Small	44.1	28	pH 7.70	7.4	1	2.6	1	2.50837	3	0.340312	3
Emersion	05:15:00	Small	40.2	28	pH 7.70	7.34	1	1.4	1	1.34365	3	0.2093	3
Emersion	05:15:00	Small	38.3	28	pH 7.70	7.29	1	2.9	1	2.76967	3	0.484075	3
Emersion	06:00:00	Large	76.1	28	pH 8.10	6.73	1	3.5	1	2.98927	3	1.89692	3
Emersion	06:00:00	Large	74.2	28	pH 8.10	6.99	1	2.6	1	2.37683	3	0.828865	3
Emersion	06:00:00	Large	66.2	28	pH 8.10	6.92	1	2	1	1.80129	3	0.738022	3
Emersion	06:00:00	Small	44.2	28	pH 8.10	7.35	1	4.1	1	3.93858	3	0.599548	3
Emersion	06:00:00	Small	43.1	28	pH 8.10	7.38	1	2.6	1	2.50421	3	0.355759	3
Emersion	06:00:00	Small	41.9	28	pH 8.10	7.43	1	3.9	1	3.77143	3	0.477519	3
Emersion	06:00:00	Large	78.2	28	pH 7.70	6.87	1	3.2	1	2.84755	3	1.30905	3
Emersion	06:00:00	Large	72.7	28	pH 7.70	6.77	1	3.1	1	2.68207	3	1.55223	3
Emersion	06:00:00	Large	72.3	28	pH 7.70	6.81	1	3.9	1	3.41473	3	1.80236	3
Emersion	06:00:00	Small	43.8	28	pH 7.70	7.31	1	2	1	1.91399	3	0.319465	3
Emersion	06:00:00	Small	43.2	28	pH 7.70	7.33	1	2.4	1	2.30124	3	0.366814	3
Emersion	06:00:00	Small	41.7	28	pH 7.70	7.39	1	2.8	1	2.69911	3	0.374719	3
Emersion	06:00:00	Small	41.7	28	pH 7.70	7.36	1	1.7	1	1.63453	3	0.243152	3
Recovery	00:00:00	Large	62.7	7	pH 8.10	6.95	1	1.6	1	1.42738	3	0.445866	3
Recovery	00:00:00	Large	63.4	7	pH 8.10	7.02	1	1.9	1	1.72268	3	0.458004	3
Recovery	00:00:00	Large	68.7	7	pH 8.10	7.11	1	1.5	1	1.38419	3	0.29913	3
Recovery	00:00:00	Large	65.1	7	pH 8.10	7.27	1	1.6	1	1.51246	3	0.226124	3
Recovery	00:00:00	Small	44.9	7	pH 8.10	7.01	1	1.4	1	1.26659	3	0.344588	3
Recovery	00:00:00	Small	44.8	7	pH 8.10	7.32	1	1.5	1	1.42642	3	0.190068	3
Recovery	00:00:00	Small	44.3	7	pH 8.10	7.36	1	1.5	1	1.4326	3	0.174096	3
Recovery	00:00:00	Small	45	7	pH 8.10	7.35	1	1.3	1	1.24029	3	0.154236	3
Recovery	00:00:00	Large	65.5	7	pH 7.70	7.13	1	2.1	1	1.94463	3	0.401328	3
Recovery	00:00:00	Large	62.4	7	pH 7.70	7.24	1	1.9	1	1.78904	3	0.286605	3
Recovery	00:00:00	Large	67.1	7	pH 7.70	7.14	1	2.2	1	2.04066	3	0.411562	3
Recovery	00:00:00	Large	67.4	7	pH 7.70	7.22	1	1.9	1	1.78413	3	0.299288	3
Recovery	00:00:00	Small	49.7	7	pH 7.70	7.38	1	2	1	1.914	3	0.222129	3
Recovery	00:00:00	Small	44.2	7	pH 7.70	7.3	1	1.6	1	1.518	3	0.211804	3
Recovery	00:00:00	Small	44.8	7	pH 7.70	7.34	1	1.4	1	1.33427	3	0.169788	3
Recovery	00:00:00	Small	40.1	7	pH 7.70	7.37	1	1.9	1	1.81648	3	0.215722	3
Recovery	03:00:00	Large	62.6	7	pH 8.10	7.42	1	1.5	1	1.44095	3	0.152515	3
Recovery	03:00:00	Large	60.8	7	pH 8.10	7.42	1	1.8	1	1.72914	3	0.183018	3
Recovery	03:00:00	Large	65	7	pH 8.10	7.5	1	1.5	1	1.45056	3	0.127702	3
Recovery	03:00:00	Small	43.8	7	pH 8.10	7.39	1	1.8	1	1.72429	3	0.195557	3
Recovery	03:00:00	Small	45.3	7	pH 8.10	7.35	1	1.6	1	1.52651	3	0.189829	3
Recovery	03:00:00	Small	45.2	7	pH 8.10	7.31	1	1.5	1	1.42479	3	0.194273	3
Recovery	03:00:00	Small	41.7	7	pH 8.10	7.33	1	1.2	1	1.14241	3	0.148759	3
Recovery	03:00:00	Large	64.5	7	pH 7.70	7.4	1	1.4	1	1.3424	3	0.14878	3
Recovery	03:00:00	Large	64.6	7	pH 7.70	7.37	1	1.5	1	1.43407	3	0.170307	3
Recovery	03:00:00	Large	64.8	7	pH 7.70	7.36	1	1.4	1	1.33709	3	0.162489	3
Recovery	03:00:00	Large	63.2	7	pH 7.70	7.39	1	1.4	1	1.34111	3	0.1521	3
Recovery	03:00:00	Small	44.9	7	pH 7.70	7.39	1	0.9	1	0.862145	3	0.0977786	3
Recovery	03:00:00	Small	46.4	7	pH 7.70	7.37	1	0.9	1	0.860439	3	0.102184	3
Recovery	03:00:00	Small	44.4	7	pH 7.70	7.42	1	1.3	1	1.24883	3	0.13218	3
Recovery	03:00:00	Small	43.1	7	pH 7.70	7.41	1	1.5	1	1.43963	3	0.155925	3
Recovery	06:00:00	Large	64.2	7	pH 8.10	7.49	1	1.2	1	1.15956	3	0.104461	3
Recovery	06:00:00	Large	64	7	pH 8.10	7.53	1	1.1	1	1.06609	3	0.0875905	3
Recovery	06:00:00	Large	65.8	7	pH 8.10	7.57	1	1.2	1	1.16617	3	0.0873826	3
Recovery	06:00:00	Large	69.9	7	pH 8.10	7.45	1	1	1	0.963167	3	0.0951403	3
Recovery	06:00:00	Small	44.9	7	pH 8.10	7.53	1	1.3	1	1.25992	3	0.103516	3
Recovery	06:00:00	Small	44.3	7	pH 8.10	7.51	1	1	1	0.967766	3	0.0832595	3
Recovery	06:00:00	Small	45	7	pH 8.10	7.5	1	1	1	0.96704	3	0.0851349	3
Recovery	06:00:00	Small	45.1	7	pH 8.10	7.44	1	0.8	1	0.769873	3	0.0778184	3
Recovery	06:00:00	Large	67.2	7	pH 7.70	7.4	1	1.4	1	1.3424	3	0.14878	3
Recovery	06:00:00	Large	65.1	7	pH 7.70	7.37	1	1.1	1	1.05165	3	0.124892	3
Recovery	06:00:00	Large	66.1	7	pH 7.70	7.39	1	1.8	1	1.72429	3	0.195557	3
Recovery	06:00:00	Large	63.5	7	pH 7.70	7.4	1	1.1	1	1.05474	3	0.116899	3
Recovery	06:00:00	Small	47.8	7	pH 7.70	7.35	1	0.8	1	0.763254	3	0.0949145	3
Recovery	06:00:00	Small	46.7	7	pH 7.70	7.34	1	1.2	1	1.14366	3	0.145532	3
Recovery	06:00:00	Small	46.9	7	pH 7.70	7.42	1	1.1	1	1.0567	3	0.111845	3
Recovery	06:00:00	Small	46.4	7	pH 7.70	7.43	1	1.3	1	1.24995	3	0.129287	3
Recovery	00:00:00	Large	64	14	pH 8.10	7.18	1	1.9	1	1.7737	3	0.326244	3
Recovery	00:00:00	Large	69.8	14	pH 8.10	7.02	1	2.1	1	1.90402	3	0.506215	3
Recovery	00:00:00	Large	63.8	14	pH 8.10	7.04	1	1.9	1	1.72995	3	0.439235	3
Recovery	00:00:00	Large	64	14	pH 8.10	7.14	1	1.9	1	1.76239	3	0.35544	3
Recovery	00:00:00	Small	43	14	pH 8.10	7	1	1.7	1	1.5346	3	0.427227	3
Recovery	00:00:00	Small	44.9	14	pH 8.10	7.24	1	1.9	1	1.78904	3	0.286605	3
Recovery	00:00:00	Small	43.5	14	pH 8.10	7.2	1	2	1	1.87265	3	0.328943	3
Recovery	00:00:00	Small	44.8	14	pH 8.10	7.21	1	2.2	1	2.06291	3	0.354114	3
Recovery	00:00:00	Large	60.9	14	pH 7.70	7.22	1	2.8	1	2.62925	3	0.441057	3
Recovery	00:00:00	Large	67.7	14	pH 7.70	7.27	1	1.7	1	1.60698	3	0.240256	3
Recovery	00:00:00	Large	70.7	14	pH 7.70	7.01	1	2	1	1.80942	3	0.492269	3
Recovery	00:00:00	Large	67.5	14	pH 7.70	7.22	1	1.7	1	1.59633	3	0.267784	3
Recovery	00:00:00	Small	41.6	14	pH 7.70	7.47	1	2	1	1.92953	3	0.182018	3
Recovery	00:00:00	Small	45.2	14	pH 7.70	7.41	1	1.7	1	1.63159	3	0.176715	3
Recovery	00:00:00	Small	46.8	14	pH 7.70	7.4	1	1.9	1	1.82183	3	0.201916	3
Recovery	00:00:00	Small	45.7	14	pH 7.70	7.45	1	2.2	1	2.11897	3	0.209309	3
Recovery	03:00:00	Large	65.7	14	pH 8.10	7.15	1	1.3	1	1.20784	3	0.238052	3
Recovery	03:00:00	Large	63.2	14	pH 8.10	7.21	1	1.5	1	1.40653	3	0.241441	3
Recovery	03:00:00	Large	62.8	14	pH 8.10	7.3	1	1.4	1	1.32825	3	0.185329	3
Recovery	03:00:00	Large	64.5	14	pH 8.10	7.29	1	1.3	1	1.2319	3	0.17589	3
Recovery	03:00:00	Small	48.4	14	pH 8.10	7.36	1	1.4	1	1.33709	3	0.162489	3
Recovery	03:00:00	Small	46.5	14	pH 8.10	7.36	1	1.3	1	1.24159	3	0.150883	3
Recovery	03:00:00	Small	43.8	14	pH 8.10	7.36	1	1	1	0.955066	3	0.116064	3
Recovery	03:00:00	Small	45.4	14	pH 8.10	7.33	1	1.1	1	1.04721	3	0.136363	3
Recovery	03:00:00	Large	61.7	14	pH 7.70	7.42	1	1.2	1	1.15276	3	0.122012	3
Recovery	03:00:00	Large	64.9	14	pH 7.70	7.46	1	1.2	1	1.15677	3	0.111663	3
Recovery	03:00:00	Large	61.4	14	pH 7.70	7.38	1	1.3	1	1.2441	3	0.144384	3
Recovery	03:00:00	Large	63.1	14	pH 7.70	7.4	1	1.1	1	1.05474	3	0.116899	3
Recovery	03:00:00	Small	46.9	14	pH 7.70	7.45	1	1.2	1	1.1558	3	0.114168	3
Recovery	03:00:00	Small	47.3	14	pH 7.70	7.41	1	1.3	1	1.24768	3	0.135135	3
Recovery	03:00:00	Small	43	14	pH 7.70	7.38	1	1.3	1	1.12	3	0.144384	3
Recovery	03:00:00	Small	46.2	14	pH 7.70	7.42	1	1.4	1	1.07	3	0.142348	3
Recovery	06:00:00	Large	62.9	14	pH 8.10	7.51	1	1.1	1	1.06454	3	0.0915854	3
Recovery	06:00:00	Large	63.1	14	pH 8.10	7.52	1	1.4	1	1.35587	3	0.113994	3
Recovery	06:00:00	Large	61.6	14	pH 8.10	7.54	1	1.4	1	1.35779	3	0.109018	3
Recovery	06:00:00	Small	40.5	14	pH 8.10	7.49	1	0.8	1	0.773039	3	0.0696409	3
Recovery	06:00:00	Small	44.6	14	pH 8.10	7.51	1	1.1	1	1.06454	3	0.0915854	3
Recovery	06:00:00	Small	42.3	14	pH 8.10	7.5	1	1.1	1	1.06374	3	0.0936484	3
Recovery	06:00:00	Small	44.1	14	pH 8.10	7.53	1	1.4	1	1.35684	3	0.111479	3
Recovery	06:00:00	Large	64.7	14	pH 7.70	7.48	1	1.2	1	1.15865	3	0.106811	3
Recovery	06:00:00	Large	65.2	14	pH 7.70	7.47	1	1.3	1	1.2542	3	0.118312	3
Recovery	06:00:00	Large	63.1	14	pH 7.70	7.41	1	1.3	1	1.24768	3	0.135135	3
Recovery	06:00:00	Large	67.9	14	pH 7.70	7.42	1	1.2	1	1.15276	3	0.122012	3
Recovery	06:00:00	Small	45.4	14	pH 7.70	7.48	1	1.3	1	1.2552	3	0.115712	3
Recovery	06:00:00	Small	47	14	pH 7.70	7.48	1	1.2	1	1.15865	3	0.106811	3
Recovery	06:00:00	Small	45.1	14	pH 7.70	7.49	1	1.1	1	1.06293	3	0.0957563	3
Recovery	06:00:00	Small	44.8	14	pH 7.70	7.46	1	1.2	1	1.15677	3	0.111663	3
Recovery	00:00:00	Large	65.4	20	pH 8.10	7.05	1	3.3	1	3.01078	3	0.747039	3
Recovery	00:00:00	Large	70.6	20	pH 8.10	6.97	1	3.4	1	3.04799	3	0.909237	3
Recovery	00:00:00	Large	62.5	20	pH 8.10	7.02	1	3.2	1	2.90136	3	0.771375	3
Recovery	00:00:00	Large	65.4	20	pH 8.10	7.03	1	3.2	1	2.90754	3	0.755421	3
Recovery	00:00:00	Small	47.2	20	pH 8.10	7.31	1	2.6	1	2.46963	3	0.336741	3
Recovery	00:00:00	Small	44.1	20	pH 8.10	7.36	1	2.8	1	2.67418	3	0.324979	3
Recovery	00:00:00	Small	46.9	20	pH 8.10	7.34	1	3.7	1	3.52628	3	0.448724	3
Recovery	00:00:00	Small	46.2	20	pH 8.10	7.3	1	2.8	1	2.6565	3	0.370658	3
Recovery	00:00:00	Large	68.2	20	pH 7.70	7.1	1	2.7	1	2.48707	3	0.549986	3
Recovery	00:00:00	Large	67.1	20	pH 7.70	7.08	1	2.6	1	2.38609	3	0.552523	3
Recovery	00:00:00	Large	64.3	20	pH 7.70	7.06	1	2.8	1	2.55971	3	0.620661	3
Recovery	00:00:00	Large	61.7	20	pH 7.70	7.05	1	2.7	1	2.46337	3	0.611213	3
Recovery	00:00:00	Small	43.6	20	pH 7.70	7.24	1	2.7	1	2.54232	3	0.407281	3
Recovery	00:00:00	Small	42.4	20	pH 7.70	7.28	1	3	1	2.83939	3	0.414848	3
Recovery	00:00:00	Small	43.1	20	pH 7.70	7.24	1	2.6	1	2.44816	3	0.392196	3
Recovery	00:00:00	Small	48.1	20	pH 7.70	7.21	1	3.2	1	3.00059	3	0.515074	3
Recovery	03:00:00	Large	66.7	20	pH 8.10	7.42	1	2.5	1	2.40159	3	0.254192	3
Recovery	03:00:00	Large	64.8	20	pH 8.10	7.37	1	3	1	2.86813	3	0.340614	3
Recovery	03:00:00	Large	64.6	20	pH 8.10	7.52	1	2.9	1	2.80858	3	0.23613	3
Recovery	03:00:00	Large	68.1	20	pH 8.10	7.41	1	2.8	1	2.68732	3	0.29106	3
Recovery	03:00:00	Small	44.5	20	pH 8.10	7.34	1	2.3	1	2.19201	3	0.278937	3
Recovery	03:00:00	Small	45	20	pH 8.10	7.36	1	2.5	1	2.38767	3	0.290159	3
Recovery	03:00:00	Small	44.1	20	pH 8.10	7.4	1	2.1	1	2.0136	3	0.22317	3
Recovery	03:00:00	Small	47.9	20	pH 8.10	7.38	1	2.3	1	2.2011	3	0.255449	3
Recovery	03:00:00	Large	69.1	20	pH 7.70	7.36	1	2	1	1.91013	3	0.232128	3
Recovery	03:00:00	Large	67.3	20	pH 7.70	7.42	1	2	1	1.92127	3	0.203354	3
Recovery	03:00:00	Large	66	20	pH 7.70	7.41	1	1.5	1	1.43963	3	0.155925	3
Recovery	03:00:00	Large	67.5	20	pH 7.70	7.37	1	2.1	1	2.00769	3	0.23843	3
Recovery	03:00:00	Small	48.2	20	pH 7.70	7.35	1	2.3	1	2.19436	3	0.272879	3
Recovery	03:00:00	Small	46.1	20	pH 7.70	7.4	1	2.1	1	2.0136	3	0.22317	3
Recovery	03:00:00	Small	46.9	20	pH 7.70	7.38	1	1.6	1	1.5312	3	0.177703	3
Recovery	03:00:00	Small	40.6	20	pH 7.70	7.4	1	2.1	1	2.0136	3	0.22317	3
Recovery	06:00:00	Large	66.8	20	pH 8.10	7.51	1	1.7	1	1.6452	3	0.141541	3
Recovery	06:00:00	Large	61.3	20	pH 8.10	7.48	1	1.5	1	1.44831	3	0.133513	3
Recovery	06:00:00	Large	64	20	pH 8.10	7.53	1	1.6	1	1.55068	3	0.127404	3
Recovery	06:00:00	Large	71.8	20	pH 8.10	7.46	1	2	1	1.92795	3	0.186105	3
Recovery	06:00:00	Small	44.1	20	pH 8.10	7.48	1	1.9	1	1.83453	3	0.169117	3
Recovery	06:00:00	Small	46.3	20	pH 8.10	7.52	1	1.6	1	1.54956	3	0.130278	3
Recovery	06:00:00	Small	47.9	20	pH 8.10	7.45	1	1.7	1	1.63738	3	0.161739	3
Recovery	06:00:00	Small	43.2	20	pH 8.10	7.59	1	2	1	1.94609	3	0.13926	3
Recovery	06:00:00	Large	63.6	20	pH 7.70	7.43	1	1.4	1	1.3461	3	0.139232	3
Recovery	06:00:00	Large	69.7	20	pH 7.70	7.44	1	1.4	1	1.34728	3	0.136182	3
Recovery	06:00:00	Large	67.1	20	pH 7.70	7.39	1	1.4	1	1.34111	3	0.1521	3
Recovery	06:00:00	Large	66.5	20	pH 7.70	7.41	1	1.3	1	1.24768	3	0.135135	3
Recovery	06:00:00	Small	42.9	20	pH 7.70	7.52	1	0.8	1	0.774781	3	0.0651392	3
Recovery	06:00:00	Small	45.9	20	pH 7.70	7.47	1	1.2	1	1.15772	3	0.109211	3
Recovery	06:00:00	Small	46.5	20	pH 7.70	7.51	1	1.1	1	1.06454	3	0.0915854	3
Recovery	06:00:00	Small	48.5	20	pH 7.70	7.46	1	2.1	1	2.02435	3	0.195411	3
Recovery	00:00:00	Large	67.8	28	pH 8.10	6.89	1	3.3	1	2.89766	3	1.03923	3
Recovery	00:00:00	Large	61.5	28	pH 8.10	6.95	1	3.8	1	3.39004	3	1.05893	3
Recovery	00:00:00	Large	61.6	28	pH 8.10	6.99	1	2.7	1	2.43179	3	0.692772	3
Recovery	00:00:00	Large	65.1	28	pH 8.10	6.86	1	3.4	1	2.95966	3	1.13738	3
Recovery	00:00:00	Small	48.9	28	pH 8.10	7.24	1	2.9	1	2.73064	3	0.43745	3
Recovery	00:00:00	Small	42.1	28	pH 8.10	7.17	1	3.4	1	3.16907	3	0.59648	3
Recovery	00:00:00	Small	48.4	28	pH 8.10	7.13	1	3.2	1	2.96324	3	0.611547	3
Recovery	00:00:00	Small	43.7	28	pH 8.10	7.2	1	3	1	2.80898	3	0.493414	3
Recovery	00:00:00	Large	66.1	28	pH 7.70	6.95	1	3.2	1	2.85477	3	0.891731	3
Recovery	00:00:00	Large	61.4	28	pH 7.70	6.94	1	4	1	3.55951	3	1.13777	3
Recovery	00:00:00	Large	66.3	28	pH 7.70	6.92	1	3.7	1	3.27555	3	1.09635	3
Recovery	00:00:00	Large	65.7	28	pH 7.70	6.89	1	3.6	1	3.16109	3	1.1337	3
Recovery	00:00:00	Small	44.3	28	pH 7.70	7.33	1	5.1	1	4.85523	3	0.632228	3
Recovery	00:00:00	Small	42	28	pH 7.70	7.34	1	4.4	1	4.19341	3	0.533618	3
Recovery	00:00:00	Small	41.6	28	pH 7.70	7.2	1	3.8	1	3.55804	3	0.624991	3
Recovery	00:00:00	Small	42.5	28	pH 7.70	7.27	1	2.9	1	2.74133	3	0.409849	3
Recovery	03:00:00	Large	68.4	28	pH 8.10	7.29	1	2.6	1	2.46381	3	0.351779	3
Recovery	03:00:00	Large	69.1	28	pH 8.10	7.32	1	2.5	1	2.37736	3	0.31678	3
Recovery	03:00:00	Large	67.1	28	pH 8.10	7.28	1	2.1	1	1.98757	3	0.290393	3
Recovery	03:00:00	Large	66.3	28	pH 8.10	7.25	1	3	1	2.82856	3	0.442822	3
Recovery	03:00:00	Small	44.6	28	pH 8.10	7.46	1	2.8	1	2.69913	3	0.260548	3
Recovery	03:00:00	Small	44.1	28	pH 8.10	7.45	1	2.6	1	2.50423	3	0.247365	3
Recovery	03:00:00	Small	45.8	28	pH 8.10	7.44	1	2	1	1.92468	3	0.194546	3
Recovery	03:00:00	Small	48.3	28	pH 8.10	7.49	1	2.7	1	2.60901	3	0.235038	3
Recovery	03:00:00	Large	65.8	28	pH 7.70	7.54	1	2	1	1.93971	3	0.15574	3
Recovery	03:00:00	Large	67.3	28	pH 7.70	7.45	1	1.5	1	1.44475	3	0.142711	3
Recovery	03:00:00	Large	69.4	28	pH 7.70	7.48	1	2	1	1.93108	3	0.178018	3
Recovery	03:00:00	Large	63.2	28	pH 7.70	7.44	1	2.5	1	2.40585	3	0.243182	3
Recovery	03:00:00	Small	45.7	28	pH 7.70	7.5	1	2.7	1	2.61101	3	0.229864	3
Recovery	03:00:00	Small	44	28	pH 7.70	7.52	1	1.6	1	1.54956	3	0.130278	3
Recovery	03:00:00	Small	46.3	28	pH 7.70	7.46	1	1.9	1	1.83155	3	0.1768	3
Recovery	03:00:00	Small	46.8	28	pH 7.70	7.51	1	1.8	1	1.74198	3	0.149867	3
Recovery	06:00:00	Large	62.2	28	pH 8.10	7.47	1	2.7	1	2.60487	3	0.245725	3
Recovery	06:00:00	Large	61.9	28	pH 8.10	7.439	1	2.5	1	2.40564	3	0.243722	3
Recovery	06:00:00	Large	65.1	28	pH 8.10	7.48	1	2.5	1	2.41385	3	0.222522	3
Recovery	06:00:00	Large	60.6	28	pH 8.10	7.39	1	2.6	1	2.49064	3	0.282471	3
Recovery	06:00:00	Small	45.3	28	pH 8.10	7.56	1	2.3	1	2.23369	3	0.171272	3
Recovery	06:00:00	Small	46.7	28	pH 8.10	7.53	1	2.1	1	2.03526	3	0.167218	3
Recovery	06:00:00	Small	45.5	28	pH 8.10	7.48	1	1.7	1	1.64142	3	0.151315	3
Recovery	06:00:00	Small	45.1	28	pH 8.10	7.45	1	1.5	1	1.44475	3	0.142711	3
Recovery	06:00:00	Large	64.9	28	pH 7.70	7.36	1	0.5	1	0.477533	3	0.0580319	3
Recovery	06:00:00	Large	68.1	28	pH 7.70	7.36	1	1.1	1	1.05057	3	0.12767	3
Recovery	06:00:00	Large	60.9	28	pH 7.70	7.4	1	1.2	1	1.15063	3	0.127526	3
Recovery	06:00:00	Large	63.7	28	pH 7.70	7.43	1	1.8	1	1.7307	3	0.179013	3
Recovery	06:00:00	Small	46.4	28	pH 7.70	7.42	1	0.6	1	0.576382	3	0.0610061	3
Recovery	06:00:00	Small	45.9	28	pH 7.70	7.43	1	0.9	1	0.865348	3	0.0895064	3
Recovery	06:00:00	Small	44	28	pH 7.70	7.42	1	1.2	1	1.15276	3	0.122012	3
Recovery	06:00:00	Small	45.8	28	pH 7.70	7.45	1	0.5	1	0.481583	3	0.0475702	3

## Sheet: LabDataChem
Experiment	Treatment.pH	SW.Temp	SW.Sal	SW.pH	SW.DIC	SW.TA	SW.pCO2	SW.HCO3	SW.CO3
Pre-emersion	pH 8.10	13.2	30.6	8.1	2078.1	2285.62	348.207	1910.52	153.493
Pre-emersion	pH 8.10	13.2	30.6	8.11	2151.6	2369.18	351.77	1975.02	162.371
Pre-emersion	pH 8.10	13.2	30.6	8.11	2000	2207.13	326.983	1835.85	150.93
Pre-emersion	pH 7.70	13.2	30.6	7.71	2273.7	2336.31	968.032	2163.73	70.8173
Pre-emersion	pH 7.70	13.2	30.6	7.7	1993.3	2049.14	868.68	1897.46	60.6889
Pre-emersion	pH 7.70	13.2	30.6	7.7	2168.4	2226.47	944.983	2064.13	66.0197
Recovery	pH 8.10	13.2	30.6	8.11	1950.9	2154.66	318.957	1790.79	147.225
Recovery	pH 8.10	13.2	30.6	8.11	2145	2362.16	350.696	1968.99	161.875
Recovery	pH 8.10	13.2	30.6	8.11	2158.6	2376.61	352.906	1981.4	162.895
Recovery	pH 7.70	13.2	30.6	7.7	2278.4	2337.95	992.951	2168.9	69.3708
Recovery	pH 7.70	13.2	30.6	7.7	1992.9	2048.76	868.519	1897.11	60.6776
Recovery	pH 7.70	13.2	30.6	7.69	2161.3	2216.29	964.115	2057.98	64.3248
